1 **Informing shigellosis prevention and control through pathogen genomics**

2

3 **Authors:**

4 Rebecca J. Bengtsson<sup>1</sup>, Adam J. Simpkin<sup>2</sup>, Caisey V. Pulford<sup>1,7</sup>, Ross Low<sup>3</sup>, David A. Rasko<sup>5</sup>, Daniel J.  
5 Rigden<sup>2</sup>, Neil Hall<sup>3,4</sup>, Eileen M. Barry<sup>6</sup>, Sharon M. Tennant<sup>6</sup>, Kate S. Baker<sup>1</sup>

6

7 **Affiliations:**

8 <sup>1</sup> Clinical Infection, Microbiology and Immunity, Institute of Infection, Veterinary and Ecological  
9 Sciences, The University of Liverpool, UK

10 <sup>2</sup> Biochemistry and Systems Biology, Institute of Systems, Molecular and Systems Biology, The  
11 University of Liverpool, UK

12 <sup>3</sup> Earlham Institute, Norwich Research Park, Norwich, UK

13 <sup>4</sup> School of Biological Sciences, University of East Anglia, Norwich, UK

14 <sup>5</sup> Department of Microbiology and Immunology, Institute for Genome Sciences, University of Maryland  
15 School of Medicine, Baltimore, Maryland, USA

16 <sup>6</sup> Center for Vaccine Development and Global Health, University of Maryland School of Medicine,  
17 Baltimore, Maryland, USA

18 <sup>7</sup> Blood Safety, Hepatitis, Sexually Transmitted Infections and HIV Service, National Infection Service,  
19 Public Health England, London, UK

20

21 **Corresponding Author:**

22 Kate S. Baker

23 Email: [kbaker@liverpool.ac.uk](mailto:kbaker@liverpool.ac.uk)

24

## 25 **Abstract**

26

27 *Shigella* spp. are the leading bacterial cause of severe childhood diarrhoea in low- and middle- income  
28 countries (LMIC), are increasingly antimicrobial resistant and have no licensed vaccine. We performed  
29 genomic analyses of 1246 systematically collected shigellae from seven LMIC to inform control and  
30 identify factors that could limit the effectiveness of current approaches. We found that *S. sonnei* contributes  
31  $\geq 20$ -fold more disease than other *Shigella* species relative to its genomic diversity and highlight existing  
32 diversity and adaptative capacity among *S. flexneri* that may generate vaccine escape variants in  $< 6$  months.  
33 Furthermore, we show convergent evolution of resistance against the current recommended antimicrobial  
34 among shigellae. This demonstrates the urgent need to integrate existing genomic diversity into vaccine  
35 and treatment plans for *Shigella*, and other pathogens.

## 36 **Introduction**

37

38 Shigellosis is a diarrhoeal disease responsible for approximately 212,000 annual deaths and  
39 accounting for 13.2% of all diarrhoeal deaths globally (1). The Global Enteric Multicenter Study (GEMS)  
40 was a large case-control study conducted between 2007 and 2011, investigating the aetiology and burden  
41 of moderate-to-severe diarrhoea (MSD) in children less than five years old in low- and middle-income  
42 countries (LMICs) (2). GEMS revealed shigellosis as the leading bacterial cause of diarrhoeal illness in  
43 children, who represent a major target group for vaccination (3). The aetiological agents are *Shigella*, a  
44 Gram-negative genus comprised of *S. flexneri*, *S. sonnei*, *S. boydii* and *S. dysenteriae*, with the former two  
45 serotypes causing the majority (90%) of attributable shigellosis in children in LMICs (3). Currently, the  
46 disease is primarily managed through supportive care and antimicrobial therapy. However, there has been  
47 an increase in antimicrobial resistance (AMR) among *Shigella* (4). Particularly concerning is the rise of  
48 resistance against the fluoroquinolone antimicrobial ciprofloxacin, the current World Health Organisation  
49 (WHO) recommended treatment, such that fluoroquinolone-resistant (FQR) *Shigella* is one of a dozen  
50 pathogens for which WHO notes new antimicrobial therapies are urgently needed (5). The high disease  
51 burden and increasing AMR of *Shigella* call for improvements in treatment and management options for  
52 shigellosis, and significant momentum has built to rise to this challenge.

53 However, there is still no licenced vaccine available for *Shigella* and one of the main challenges in  
54 its development is the considerable genomic and phenotypic diversity of the organisms (6). The distinct  
55 lipopolysaccharide O-antigen structures of *Shigella* determine its serotype and is responsible for conferring

56 the short to medium term serotype-specific immunity following infection (7-10). Hence, considerable  
57 efforts are focused on generating O-antigen specific vaccines. However, with the exception of the single  
58 serotype *S. sonnei*, each species encompasses multiple diverse serotypes: 14 serotypes/subserotypes for *S.*  
59 *flexneri*, 19 for *S. boydii* and 15 for *S. dysenteriae* (11). Thus, for serotype-targeted vaccine approaches,  
60 multivalent vaccines are proposed to provide broad protection against disease (6, 12). Furthermore, while  
61 O-antigen conjugates are a leading strategy, challenge studies have recently demonstrated poor efficacy  
62 (13, 14). An attractive alternative and/or complement to serotype-targeted vaccine formulations are specific  
63 subunit vaccines which target highly conserved proteins and may offer broad protection. There are several  
64 candidates in development that have demonstrated protection in animal models (15, 16), but the degree of  
65 antigenic variation for these targets among the global *Shigella* population remains unknown.

66 Whole-genome sequencing analysis (WGS) provides sufficient discriminatory power to resolve  
67 phylogenetic relationships and characterise diversity of bacterial pathogens, essential to informing vaccine  
68 development and other aspects of disease control (17, 18). However, these critical analysis tools are yet to  
69 be applied to a pathogen collection appropriate for broadly informing shigellosis control in the critical  
70 demographic of children in LMICs. Here, we apply WGS to *Shigella* isolates sampled during GEMS,  
71 representing 1,246 systematically collected isolates from across seven nations in sub-Saharan Africa and  
72 South Asia with some of the highest childhood mortality rates (2, 19). We found evidence of the potential  
73 benefit of genomic subtype-based targeting, characterised pathogen features that will complicate current  
74 vaccine approaches, and highlighted regional differences among *Shigella* diversity, as well as determinants  
75 of AMR, including convergent evolution toward resistance against currently recommended treatments. Our  
76 analysis of this unparalleled pathogen collection informs the control and prevention of shigellosis in those  
77 populations most vulnerable to disease.

78

## 79 **Results and Discussion**

80

### 81 *Regional diversity of Shigella spp. across LMIC*

82

83 To date, this is the largest representative dataset of *Shigella* genomes from LMICs ( $n=1246$ ),  
84 collected across seven sites from Asia, West Africa and East Africa, comprised of 806 *S. flexneri*, 305 *S.*  
85 *sonnei*, 75 *S. boydii* and 60 *S. dysenteriae* (Fig. 1A). To compare the genomic diversity of *Shigella* species,  
86 we determined the distributions of pairwise single-nucleotide polymorphism (SNP) distances and scaled

87 the total detected SNPs against the length of the chromosome (in kbp) for each species (Fig. 1B). This  
88 revealed that *S. boydii* contained the greatest diversity (24.2 SNPs/kbp), followed by *S. flexneri* (19.5  
89 SNPs/kbp) and *S. dysenteriae* (11.8 SNPs/kbp), with *S. sonnei* being >9.8-fold less diverse (1.2 SNPs/kbp)  
90 or >13.1-fold less diverse (0.9 SNPs/kbp) excluding two outliers (see below, Fig. 1B). This revealed that *S.*  
91 *sonnei* caused between 20 and 25-fold more disease relative to genomic diversity than *S. flexneri* and either  
92 *S. dysenteriae* or *S. boydii* (Fig. 1B), indicating the value of vaccination against *S. sonnei* as a comparatively  
93 conserved target relative to disease burden. Examination of the gene repertoire revealed that this relative  
94 chromosomal diversity was consistent with the accessory genome variation among species (fig. S1).

95 Early global population structure studies revealed that each *Shigella* species is delineated into  
96 multiple WGS subtypes (20-23). Specifically, *S. flexneri* is comprised of seven phylogroups (PGs) (20)  
97 and *S. sonnei* of five lineages (24). To describe the genomic epidemiology of the GEMS *Shigella* within  
98 existing frameworks we constructed species phylogenetic trees and integrated these with epidemiological  
99 metadata and publicly available genomes. The *S. flexneri* phylogeny revealed two distinct lineages  
100 separated by ~34,000 SNPs; one comprising five previously described PGs (20) and a distant clade  
101 comprised largely of *S. flexneri* serotype 6 isolates (herein termed Sf6), contributing distinctly to the disease  
102 burden of each country (Fig. 2 and fig. S2). Phylogenetic analysis of *S. sonnei* revealed that all but two  
103 isolates belonged to the globally dominant multidrug resistant (MDR) Lineage III (21) (fig. S3). For *S.*  
104 *boydii* and *S. dysenteriae*, a total of four and two previously described phylogenetic clades (23, 25) were  
105 identified, respectively (fig. S4). Marked phylogenetic association of isolates with country of origin  
106 prompted an examination of species genomic diversity by region (East Africa, West Africa and Asia) and  
107 revealed that while *S. flexneri* diversity was comparable across regions, diversity varied by region for the  
108 remaining species (fig. S5). Specifically, *S. sonnei* was more genomically diverse in East Africa owing to  
109 the presence of two Lineage II isolates from Mozambique. For *S. boydii*, Asia contained greater diversity  
110 than African regions, owing to isolates belonging to additional clades. *S. dysenteriae* diversity was lower  
111 in West Africa relative to other regions by virtue of having only one circulating clade. These geographical  
112 differences highlight the importance of considering regional variations during vaccine development and  
113 that vaccine candidates should be evaluated across multiple regions.

114

### 115 ***Genomic subgroups as an alternative targeting method***

116

117 To explore the utility of vaccination targeting genomic subtype (relative to targeting serotype) for  
118 *S. flexneri*, we determined the relative effect size of the dominant subtype on the epidemiological outcome

119 of shigellosis (i.e., isolates derived from case patients rather than from controls, as defined in GEMS). The  
120 dominant genomic subtype was PG3, which comprised the majority (47%, 378/806) of total isolates, as  
121 well as case (50%, 341/687) isolates, with some regional variation (Fig. 2). This resulted in an increased  
122 odds of cases (OR = 2.3, 95% CI = 1.5-3.6,  $p = 0.0001$ ) for PG3 compared with other genomic subtypes  
123 (PGs and Sf6) (methods, table S3). The association of cases with the dominant serotype, *S. flexneri* serotype  
124 2a (accounting for 29% (234/806) of total isolates and 31% (210/687) of case isolates) also resulted in an  
125 increased odds of cases (OR = 1.9, 95% CI = 1.7-3.2,  $p = 0.0099$ ) (table S3). But the higher prevalence and  
126 larger effect size of PG3 relative to serotype 2a on case status offers compelling evidence that targeting  
127 vaccination by phylogroup might offer broader coverage per licenced vaccine relative to, or in combination  
128 with, a serotype-specific approach.

129

### 130 *Diversity of S. flexneri relevant to serotype-targeted vaccines*

131

132 The development of serotype-targeted vaccines is complicated by the diversity and distribution of  
133 serotypes, which are heterogenous over time and place (8, 19, 26, 27). Furthermore, genetic determinants  
134 of O-antigen modification are often encoded on mobile genetic elements (28, 29) that can move horizontally  
135 among bacterial populations, causing the recognised, but poorly quantified phenomenon of serotype  
136 switching (20, 27, 28), which may result in the rapid escape of infection induced immunity against  
137 homologous serotypes. For our analyses of serotype switching, we focused on *S. flexneri* owing to high  
138 disease burden and serotypic diversity. Phenotypic serotyping data were overlaid onto the phylogeny and  
139 revealed that while generally there was a strong association of genotype (i.e. PG/Sf6) with serotype  
140 (Fisher's exact test;  $p < 2.20E-16$ ), multiple serotypes were observed for each genotype (Fig. 3). The greatest  
141 serotype diversity was observed in PG3, comprised of seven distinct serotypes and two subserotypes.  
142 Correlation of serotypic diversity (number of serotypes) and genomic diversity (maximum pairwise SNP  
143 distance within genotype) revealed no evidence for an association, but a significant positive correlation of  
144 serotypic diversity with the number of isolates in each genotype was found (fig. S6), indicating that serotype  
145 diversity scales with prevalence.

146 To qualitatively and quantitatively determine serotype switching across *S. flexneri*, we examined  
147 the number of switches occurring within each genotype. A switching event was inferred when a serotype  
148 emerged (either as a singleton or monophyletic clade) that was distinct from the majority (>65%) serotype  
149 within a genotype (Fig. 3 and fig. S7). PG6 was excluded from the analysis, as only three isolates from  
150 GEMS belonged to this genotype and a dominant serotype could not be inferred. Quantitatively, this

151 revealed serotype switching was infrequent, with only 26 independent switches (3.3% of isolates) identified  
152 across the five *S. flexneri* genotypes. Although the frequency of switching varied across the genotypes,  
153 statistical support for an association of serotype switching with genotype fell short of significance (Fisher's  
154 exact test;  $p = 0.09$ ). Qualitatively, the majority (22/26) of switching resulted in a change of serotype, with  
155 few (4/26) resulting in a change of subserotype. Examination of O-antigen modification genes revealed that  
156 serotype switching was facilitated by changes in the composition of phage-encoded *gtr* and *oac* genes in  
157 the genomes, as well as point mutations in these genes (table S4). Our data also revealed that few (4/26)  
158 switching events resulted in more than two descendant isolates (fig. S7). This indicates that while natural  
159 immunity drives the fixation of relatively few serotype-switched variants in the short term, the potential  
160 pool of variants that could be driven to fixation by vaccine-induced selective pressure following a serotype-  
161 targeted vaccination program is much larger.

162 In order to estimate the likely timeframe over which serotype switching events might be expected  
163 to occur, we estimated the divergence time of the phylogenetic branch giving rise to each switching event.  
164 To streamline the analysis, we focused on two subclades of PG3, the most prevalent phylogroup, in which  
165 seven independent serotype switching events were detected (fig. S8). Based on the timeframes observed  
166 within our sample (spanning 4 years from 2007 to 2010), serotype switching was estimated to occur within  
167 an average of 348 days, ranging from 159 days (95% highest posterior density [HPD]: 16 - 344) to 10206  
168 days (28 years) (95% HPD: 5494 - 15408) (table S5). Taken together, our data shows that although  
169 serotype-switching frequency is low, it can occur over relatively short timeframes and lead to serotype  
170 replacement such that non-vaccine serotypes could replace vaccine serotypes following a vaccination  
171 program, as has been observed for *Streptococcus pneumoniae* (30, 31). These elucidated serotype switching  
172 dynamics (i.e. switching occurring over short timeframes and quantitatively proportional to disease burden)  
173 highlights the value of a multivalent vaccine and geographically coordinated implementation of *Shigella*  
174 vaccination.

175

### 176 ***Heterogeneity among Shigella vaccine protein antigens***

177

178 Conserved antigen-targeted vaccines can overcome some hurdles of serotype-targeted vaccines.  
179 Hence, we performed detailed examination of six protein antigens that are currently in development and  
180 have demonstrated protection in animal models (Table 1). First, we assessed the distribution of the  
181 candidates among GEMS *Shigella* isolates which revealed that the proportional presence of antigens varied  
182 across species and with genetic context. Specifically, genes encoded on the virulence plasmid (*ipaB*, *ipaC*,



183 *ipaD*, *icsP*) were present in >85% of genomes for each species with the exception of *S. sonnei* (fig. S9).  
184 The low proportion ( $\leq 5\%$ ) of virulence plasmid encoded genes detected among *S. sonnei* was caused by a  
185 similarly low detection of the virulence plasmid among *S. sonnei* (6%), which likely arose due to loss during  
186 sub-culture (32). In contrast, the chromosomally encoded *ompA* was present in >98% of all isolates, while  
187 the *sigA* gene (carried on the chromosomally integrated SHI-1 pathogenicity island (17)) was present in  
188 99% of *S. sonnei* genomes, but only 63% of *S. flexneri* genomes. Notably, among *S. flexneri* genomes, the  
189 *sigA* gene was exclusively found in PG3 and Sf6, and present in >96% of isolates in each genotype) (fig.  
190 S2), indicating an appropriate distribution for targeting the two genotypes. Second, we assessed the antigens  
191 for amino acid variation and modelled the likely impact of detected variants, as antigen variation may also  
192 lead to vaccine escape, as demonstrated for the P1 variant of SARS-CoV2 (33, 34). We determined the  
193 distribution of pairwise amino acid (aa) sequence identities per antigen against *S. flexneri* vaccine strains  
194 for each species (methods). Overall, sequence identities were >90% but varied with antigen (fig. S9). For  
195 example, OmpA was present in the highest proportion of genomes, but showed ~5% sequence divergence,  
196 while SigA was present in fewer genomes, but exhibited little divergence (<0.5%) among species. The least  
197 conserved sequence was IpaD, ranging from 3 to 7% divergence within species.

198 Not all antigenic variation will affect antibody binding, so we performed *in silico* analyses of the  
199 detected variants to assess whether they may compromise the antigens as vaccine targets. Again, we focused  
200 our analyses on *S. flexneri* owing to its high disease burden and the likely complication of serotype-based  
201 vaccination strategies for this species. We detected 121 variants across the six antigens, the majority (79%)  
202 of which correlated with genotype (i.e. belonging to either PGs 1-5 or Sf6, fig. S11). We then determined  
203 if amino acid variants were located in immunogenic regions (i.e. epitope/peptide fragment) (fig. S10) and  
204 assessed their potential destabilization of protein structure through *in silico* protein modelling. For IpaB,  
205 IpaC and IpaD, the epitopes have been empirically determined (35, 36). The sequence and location of  
206 peptide fragments of SigA, IcsP and OmpA used in vaccine development are available (37, 38). Variants  
207 located within the immunogenic regions were identified for all antigens relative to PG3 reference sequences  
208 (methods, Fig. 4). Only 4 of 121 variants were predicted to be highly destabilising to protein structure, and  
209 these occurred in: OmpA (residue 89) at a periplasmic turn, SigA (residues 1233 and 1271) in adjacent  
210 extracellular turns in the translocator domain (fig. S12), and in IpaD (residue 247) within a beta-turn-beta  
211 motif flanking the intramolecular coiled-coil (Fig. 4). While it remains possible that these mutations could  
212 affect antigenicity through the disruption of folding or global stability, it is less likely than if they occurred  
213 in immunogenic regions. These results thus indicate that it is less likely that existing natural variation will  
214 compromise antigen-based vaccine candidates for *Shigella* compared with serotype-based vaccines.  
215 However, our approach is limited and the knowledge base incomplete. For example, there was no suitable

216 template available for IpaC, and some epitopes were predicted to be in membrane regions which should be  
217 inaccessible to antibodies, indicating the need for more accurate publicly available protein structures to be  
218 developed for many of the vaccine antigen candidates.

219

### 220 *Region-specific details of antimicrobials as a stop gap*

221

222 **Until a licensed vaccine is available, we must continue to treat shigellosis with supportive care**  
223 **and antimicrobials, for which the current WHO recommendation is the fluoroquinolone,**  
224 **ciprofloxacin (39).** However, FQR *Shigella* is currently on the rise and spreading globally (40). To examine  
225 AMR prevalence among GEMS isolates for evaluating treatment recommendations, we screened for known  
226 genetic determinants (horizontally acquired genes and point mutations) conferring resistance or reduced  
227 susceptibility to antimicrobials. Although we used only minimal phenotypic data, phenotypic resistance  
228 and genotypic prediction correlate well in *S. flexneri* and *S. sonnei* (41, 42). Our analysis revealed that 95%  
229 (1189/1246) of isolates were multidrug resistant (MDR), carrying AMR determinants against three or more  
230 antimicrobial classes (Fig 5A). *S. flexneri* exhibited the greatest diversity of AMR determinants, with a total  
231 of 45 identified determinants across the population, comprising of 38 AMR genes and 7 point mutations  
232 (fig. S13 and table S1), and an extensive AMR genotype diversity of 72 unique resistance profiles (Fig. 5A  
233 and fig. S14). In contrast, *S. sonnei* exhibited the least diversity, with only 23 AMR determinants and 21  
234 unique resistance profiles. An intermediate and comparable degree of AMR diversity was observed for both  
235 *S. dysenteriae* and *S. boydii*.

236 Overall, a high frequency of AMR genes conferring resistance against aminoglycoside,  
237 tetracycline, trimethoprim, and sulphonamide antimicrobials was observed, while resistance against other  
238 antimicrobial classes varied with region and species (Fig. 5B). The extended spectrum beta-lactamase gene  
239 *blaCTX-M-15* was detected in a small (9/1246) percentage of isolates, and genes conferring resistance to  
240 macrolides and lincosamides were also infrequent (fig. S13), indicating that the recommended second-line  
241 treatments likely remain effective antimicrobials (43).

242 However, higher rates of resistance were found against the first-line treatment. FQR in *Shigella* can  
243 be conferred through the acquisition of FQR-genes or, more typically, by point mutations in the  
244 chromosomal Quinolone Resistance Determining Region (QRDR) within the DNA gyrase (*gryA*) and the  
245 topoisomerase IV (*parC*) genes. Single and double QRDR mutations are known to confer reduced  
246 susceptibility to ciprofloxacin and are evolutionary intermediates on the path to resistance, conferred by



247 triple mutations in this region (41, 44). Overall, FQR-genes were uncommon in *S. flexneri* (4%, 33/806), *S.*  
248 *sonnei* (1%, 3/305) and *S. dysenteriae* (7%, 4/60), but were present in 32% (24/75) of *S. boydii*. QRDR  
249 mutations were identified in all species (fig. S13), but were more common among *S. sonnei* (65%, 199/305)  
250 and *S. flexneri* (54%, 435/806) than compared with *S. boydii* (15%, 11/75) and *S. dysenteriae* (30%, 18/60).  
251 Among these, triple QRDR mutations were identified in 13% (106/806) of *S. flexneri* and 14% (44/305) of  
252 *S. sonnei*. Analysis of the QRDR mutants across the phylogenies indicate marked convergent evolution  
253 toward resistance across the genus. Specifically, all triple QRDR mutant *S. sonnei* belonged to one  
254 monophyletic subtype (previously described as globally emerging from Southeast Asia (45)), while three  
255 distinct triple QRDR mutational profiles were found across three polyphyletic *S. flexneri* genotypes (Fig.  
256 5C). Thus, the polyphyletic distribution of single, double, and triple QRDR mutants indicates continued  
257 convergent evolution of lineages with reduced susceptibility or resistant to FQR.

258 We then stratified the dataset by geographic region which revealed that FQR were largely  
259 associated with isolates from Asia where fluoroquinolones are more frequently used compared to African  
260 sites (Fig. 5B) (46), which is consistent with trends observed in atypical enteropathogenic *Escherichia coli*  
261 isolated from GEMS (46). Our analyses thus suggest that for the period of GEMS trial (2007 – 2011), 17%  
262 (150/881) of *Shigella* isolates from Asia were resistant and 58% (508/881) had reduced susceptibility to the  
263 WHO recommended antimicrobial. The high level of reduced susceptibility together with marked  
264 convergent evolution toward resistance suggests that management of shigellosis with fluoroquinolones at  
265 these sites may soon be ineffective and regional antimicrobial treatment guidelines may require updating.  
266 These results indicate the value of AMR and microbiological surveillance in LMICs and the control and  
267 management of shigellosis will be improved by initiatives such as the Africa Pathogen Genomics Initiative  
268 (47) and the WHO Global Antimicrobial Resistance Surveillance System (48).

## 269 **Conclusions**

270

271 Pathogen genomics is a powerful tool that has a wide range of applications to help combat  
272 infectious diseases. Here, we have applied this tool to an unparalleled systematically collected *Shigella*  
273 dataset to characterise the relevant population diversity of this pathogen across LMICs in a pre-vaccine era.  
274 Our results revealed that current antimicrobial treatment guidelines for shigellosis should be updated, and  
275 that improved surveillance will be essential to guide **antimicrobial stewardship**. This study has also  
276 highlighted the urgent need to continue the development of *Shigella* vaccines for children in endemic areas.  
277 The genomic diversity in *Shigella* presents a major hurdle in controlling the disease and we have  
278 demonstrated the anticipated pitfalls of current vaccination approaches, emphasising the importance of

279 considering the local and global diversity of the pathogens in vaccine design and implementation. Although  
280 our results are focused on shigellosis, our approach is translatable to other bacterial pathogens which is  
281 particularly relevant as we enter the era of vaccines for AMR.

282

## 283 **Materials and Methods**

284

### 285 ***Dataset, bacterial isolates and sequencing***

286

287 A total of 1,264 *Shigella* isolates from GEMS were under investigation in this study (2, 3). All isolates were  
288 derived from stool samples/rectal swabs: their identification, confirmation and isolation have been  
289 described previously (19). A total of 1,344 isolates were sequenced at the Earlham institute, with genomic  
290 DNA extraction, sequencing library construction and whole genome sequencing carried out according to  
291 the Low Input Transposase Enabled (LITE) pipeline described by Perez-Sepulveda *et al* (49). Among these,  
292 225 isolates failed QC with a mean sample depth of coverage <10x and an assembly size of <4MB and  
293 were re-sequenced. For these isolates, genomic DNA was re-extracted at the University of Maryland School  
294 of Medicine (Baltimore, Maryland) from cultures grown in Lysogeny Broth overnight. DNA was extracted  
295 in 96-well format from 100 µL of sample using the MagAttract PowerMicrobiome DNA/RNA Kit (Qiagen,  
296 Hilden, Germany) automated on a Hamilton Microlab STAR robotic platform. Bead disruption was  
297 conducted on a TissueLyser II (20 Hz for 20 min) instrument in a 96 deep well plate in the presence of 200  
298 µL phenol/chloroform. Genomic DNA was eluted in 90 µl water after magnetic bead clean up and the  
299 resulting genomic DNA was quantified by Pico Green. The genomic DNA was shipped to the Centre for  
300 Genomic Research (University of Liverpool) for whole genome sequencing. Sequencing library was  
301 constructed using NEBNext® Ultra™ II FS DNA Library Prep Kit for Illumina and sequenced on the  
302 Illumina® NovaSeq 6000 platform, generating 150bp paired-end reads.

303 An additional 125 publicly available *Shigella* and *E. coli* reference genomes were included in the  
304 analyses. Details of GEMS and reference genomes analysed in this study are listed in table S1 and table S2,  
305 respectively.

306

### 307 ***Sequence mapping and variant calling***

308

309 Adaptors and low-quality bases were trimmed with Trimmomatic v0.38 (50), reads qualities were  
310 assessed using FastQC v0.11.6 (<https://www.bioinformatics.babraham.ac.uk/projects/fastqc/>) and MultiQC  
311 v1.7 (51). Filtered reads were mapped against *Shigella* reference genomes with BWA mem v0.7.17 (52)  
312 using default parameters. *S. flexneri*, *S. sonnei*, *S. boydii* and *S. dysenteriae* sequencing reads were mapped  
313 against reference genomes from Sf2a strain 301 (accession NC\_004337), Ss046 (accession NC\_007384),  
314 Sb strain CDC 3083-94 (accession NC\_010658) and Sd197 (accession NC\_007606), respectively.  
315 Mappings were filtered and sorted using the SAMtools suite v1.9-47 (53), and optical duplicate reads were  
316 marked using Picard v2.21.1-SNAPSHOT MarkDuplicates (<http://broadinstitute.github.io/picard/>).  
317 QualiMap v2.2.2 (54) was used to evaluate mapping qualities and estimate mean sample depth of coverage.  
318 Sequencing reads for isolates sequenced using the LITE pipeline and re-sequenced at CGR were combined  
319 to increase overall sample depth of coverage. Sequence variants were identified against reference using  
320 SAMtools v1.9-47 mpileup and bcftools v1.9-80 (53). Low quality SNPs were filtered if mapping quality  
321 <60, Phred-scaled quality score <30 and read depth <4.

322

### 323 ***Phylogenetic reconstruction and inference of genomic diversity***

324

325 Filtered SNP variants were used to generate a reference-based pseudogenome for each sample,  
326 where regions with depth of coverage >4x were masked in the pseudogenome. Additionally, regions  
327 containing phage (identified using PHASTER (55)) and insertion sequences were identified from the  
328 reference genomes, and co-ordinates were used to mask these sites on the pseudogenomes using BEDTools  
329 v2.28.0 maskfasta (56). For each species, chromosome sequences from the masked pseudogenomes were  
330 extracted and concatenated. Gubbins v2.3.4 (57) was used to remove regions of recombination and invariant  
331 sites from the concatenated pseudogenomes. This generated a chromosomal SNP alignment length of  
332 78,251 bp for *S. flexneri* (n=806), 5,081 bp for *S. sonnei* (n=305), 98,842 bp for *S. boydii* (n=75) and 45,031  
333 bp for *S. dysenteriae* (n=60). Maximum-likelihood phylogenetic reconstruction was performed  
334 independently for each species and inferred with IQ-TREE v2.0-rc2 (58) using the FreeRate nucleotide  
335 substitution, invariable site and ascertainment bias correction model, with 1000 bootstrap replicates. In  
336 order to contextualise GEMS isolates within the established genomic subtypes and to infer the most  
337 appropriate root for each species tree, phylogenetic trees were reconstructed including publicly available  
338 reference genomes of isolates from previously defined lineages/phylogroups/clades and *E. coli* isolates  
339 (table S2). Phylogenetic tree for *S. flexneri*, *S. boydii* and *S. dysenteriae* was rooted using *E. coli* strain

340 IAI1-117 (accession SRR2169557) as an outgroup, respectively. Phylogenetic tree for *S. sonnei* was  
341 midpoint rooted. Visualizations were performed using interactive Tree of Life (iTOL) v6.1.1 (59).

342

343 To measure the extent of *shigella* genomic diversity among GEMS population, pairwise SNP  
344 distance was determined from the alignment of core genome SNPs identified outside regions of  
345 recombination using snp-dists v0.7.0 (<https://github.com/tseemann/snp-dists>). For each species, the  
346 genomic diversity, measured by SNPs per kbp, was determined by dividing the core genome SNP alignment  
347 length by the core genome size (*S. flexneri* 4,015,307 bp, *S. sonnei* 4,177,070 bp, *S. boydii* 4,088,693 bp  
348 and *S. dysenteriae* 3,821,602 bp). Scaling the proportion of disease burden attributable by the genome  
349 diversity of each species, the percentage of species contribution to GEMS shigellosis disease burden was  
350 divided by the number of SNPs per kbp.

351

### 352 *Serotype switching time frame inference*

353

354 To estimate the likely time frame of serotype switching, we performed temporal phylogenetic  
355 reconstruction in order to infer the time of divergence along branches exhibiting serotype switching. We  
356 streamlined the analysis and focused on isolates belonging to two subclades of *S. flexneri* PG3. First, for  
357 each of the two subclades ( $n=99$  and  $n=45$ ), a maximum-likelihood phylogeny was reconstructed based on  
358 genome multiple sequence alignments (described above). Then, TempEst v1.5.3 (60) was used determine  
359 if there is sufficient temporal signal in the data by inferring linear relationship between root-to-tip distances  
360 of the phylogenetic branches with the year of sample isolation. Data from both subclades revealed positive  
361 correlation between sampling time and phylogenetic root-to-tip divergence, with  $R^2$  of 0.186 and 0.111 (fig.  
362 S16). Once temporal signals within each of the two datasets were confirmed, core genome SNP alignments  
363 of length 559 bp and 1,244 bp were analysed independently using BEAST2 v2.6.1 (61). The parameters  
364 were as follows: dates specified as days, bModelTest (62) implemented in BEAST2 was used to infer the  
365 most appropriate substitution model, a relaxed log normal clock rate with a coalescent Bayesian skyline  
366 model for population growth. A total of five independent chains were performed, each with chain length of  
367 250,000,000, logging every 1,000 and accounting for invariant sites. Convergence of each run was visually  
368 assessed with Tracer v1.7.1 (63), with all parameter effective sampling sizes  $\geq 200$ . Tree files were sampled  
369 and combined using LogCombiner v2.6.1, the combined files were then summarised using TreeAnnotator  
370 v2.6.0 with 10% burn-in to generate Maximum Clade Credibility tree (64). Divergence time was inferred

371 by reading the branch length from the most recent common ancestor to the first sampled isolate that  
372 serotype-switched.

373

### 374 ***Genome assembly and annotation***

375

376 Draft genome sequences were assembled using Unicycler v0.4.7 (65) with `-min_fasta_length` set  
377 to 200. QUAST v5.0.2 (66) was used to assess the qualities of the assemblies. Assemblies with total  
378 assembly length outside the range of <4Mbp and >6.4Mbp were removed. Resulting in an average length  
379 of 4,275,508 bp (range: 4 4,004,109 – 4,538,734 bp) for *S. flexneri*, 4,264,097 bp (range: 4,008,630 –  
380 4,779,279 bp) for *S. sonnei*, 4,227,671 bp (range: 4,000,714 – 4,689,815 bp) for *S. boydii* and 4,297,921 bp  
381 (range: 4,040,642 – 4,659,860 bp) for *S. dysenteriae*. An average N50 value of 29,804 bp (range: 6,810 –  
382 34,658 bp) was generated for *S. flexneri*, 23,961 bp (range: 11,547 – 30,008 bp) for *S. sonnei*, 20,835 bp  
383 (range: 15,323 – 40,119 bp) for *S. boydii* and 22,137 bp (range: 14,090 – 31,358 bp) for *S. dysenteriae*.  
384 Draft genomes were annotated using Prokka v1.13.3 (67).

385

### 386 ***Pangenome analysis***

387

388 The pangenome of each species was defined using Roary v3.12.0 (68) without splitting paralogues.  
389 The pangenome accumulation curves were generated separately for each species using the `specaccum`  
390 function from Vegan v2.5-7 (<https://github.com/vegandevs/vegan/>), with 100 permutations and random  
391 subsampling. Inspections of the variable gene content showed that all four species had open pangenomes,  
392 implying that the number of unique gene count increases with the addition of newly sequenced genomes.

393

### 394 ***Shigella flexneri* molecular serotyping**

395

396 *Shigella* serotype data was provided by collaborators at the University of Maryland School of  
397 Medicine (Baltimore, Maryland), serotyping was performed as previously describe (19). *In silico* serotyping  
398 of *S. flexneri* genomes was performed using ShigaTyper v1.0.6 (69) which detects the presence of serotype-  
399 determining genetic elements from sequencing reads to predict serotype. ShigaTyper predictions were 84%

400 concordant to the serotype data provided. SRST2 v2 (70) was used to detect mutations within serotype-  
401 determining genetic elements, run against ShigaTyper sequence database with default parameters.

402

### 403 ***Protein antigen screening***

404

405 To determine the presence of antigen vaccine candidates among GEMS *Shigella* isolates, genes of  
406 the antigen vaccine candidates was screened against draft genome assemblies using screen\_assembly (17)  
407 with a threshold of  $\geq 80\%$  identity and  $\geq 70\%$  coverage to the reference sequence. Reference sequences for  
408 *ipaB*, *ipaC*, *ipaD* and *icsP* were derived from *S. flexneri* 5a strain M90T (accession GCA\_004799585) and  
409 *ompA* and *sigA* was derived from *S. flexneri* 2a strain 2457T (accession NC\_004741), both strains are  
410 commonly used in the laboratory for vaccine development. Antigen sequence variations were determined  
411 by examining the BLASTp (71) percentage identity against relevant query reference sequence. Allelic  
412 variations of antigen vaccine candidates among *S. flexneri* population were identified manually by  
413 visualising amino acid sequence alignments using AliView v1.26 (72).

414

### 415 ***Protein antigen modelling***

416

417 In order to assess the effect of point mutations on protein stability and vaccine escape, six antigen  
418 candidates from *S. flexneri* PG3 were modelled: OmpA, SigA, IcsP, IpaB, IpaC and IpaD (Table 1). PG3  
419 was selected as it is the most prevalent phylogroup and is therefore the target of current vaccine  
420 development. To model the antigen targets, we first searched for a suitable template using HHPred (73, 74).  
421 Five of the six proteins (OmpA, SigA, IcsP, IpaB and IpaD) had suitable homologues available. To improve  
422 the performance of the comparative modelling, the signal peptides for OmpA, SigA and IcsP were removed  
423 and OmpA, SigA and IpaB were modelled in two parts to make use of optimal templates. RosettaCM (75)  
424 was used to generate 200 models for each of the five proteins using the single best available template. For  
425 IpaC, where no suitable templates were available, trRosetta (76) was used to create five de novo predicted  
426 models. The best model for each antigen candidate was selected using QMEAN's average local score.  
427 QMEANbrane (77, 78) was used for suitable membrane proteins (IpaB, IpaC & IpaD), otherwise  
428 QMEANDisCo (77) was used (table 6). Full details of the modelling and ranking are shown in table 7. The



429 effect of point mutations on the stability of the antigen candidates was assessed using PremPS, and the  
430 default criterion of ( $\Delta\Delta G > 1 \text{ kcal mol}^{-1}$ ) used to defining highly destabilising mutations (79).

431

### 432 *Detection of AMR genetic determinants and AMR testing*

433

434 To detect the presence of known genetic determinants for AMR, AMRFinderPlus v3.9.3 (80) was  
435 used to screen draft genome assemblies against the AMRFinderPlus database, which is derived from the  
436 Pathogen Detection Reference Gene Catalog (<https://www.ncbi.nlm.nih.gov/pathogens/>). AMRFinderPlus  
437 was performed with the organism-specific option for *Escherichia*, to screen for both point mutations and  
438 genes, and filter out uninformative genes that were nearly universal in a group. Output was then filtered to  
439 remove genetic determinants identified with  $\leq 80\%$  coverage and  $\leq 90\%$  identity. The presence of *S. sonnei*  
440 virulence plasmid was confirmed using short-read mapping using BWA mem (as described above) against  
441 the reference virulence plasmid from Ss046 (GenBank accession CP000039.1). Presence of the plasmid  
442 was defined by mapping of  $>60\%$  breadth of coverage across the reference. Visualisations of AMR  
443 resistance profiles were performed with UpSetR v2.1.3 (81). Four *S. flexneri* isolates with triple QRDR  
444 mutations were phenotypically tested for ciprofloxacin resistance using the Kirby-Bauer standardized disk  
445 diffusion method (82).

446

### 447 *Statistical analyses*

448

449 The strength of association between *S. flexneri* genomic subtype and serotype with the occurrence  
450 of case outcome was calculated using MedCalc's odds ratio calculator v20  
451 ([https://www.medcalc.org/calc/odds\\_ratio.php](https://www.medcalc.org/calc/odds_ratio.php)) to report the odds ratio, 95% confidence interval and  
452 statistical association. Association of genomic subtype with serotype and serotype switching was tested  
453 using Fisher's exact test. Linear regression analysis was used to determine the correlation between serotype  
454 diversity to various properties of genomic subtype. Both analyses were performed using R v4.0.3.

455

456

## 457 **Acknowledgements**

458

459 We acknowledge and thank members of Baker group and Lab H at the University of Liverpool, and Rodrigo  
460 Bacigalupe at KU Leuven for invaluable discussions. We also thank Jay Hinton and Blanca Perez  
461 Sepulveda for logistical support orchestrating the thermolysate shipping. The authors are grateful to Sam  
462 Haldenby, Matthew Gemmell and Richard Gregory and the Centre for Genomics Research, University of  
463 Liverpool for technical support. The authors acknowledge Dr. Irene Kasumba, Ms. Jennifer Jones, Mr.  
464 Sunil Sen and Ms. Jasnehta-Permala-Booth for preparing GEMS *Shigella* isolates for sequencing and  
465 antimicrobial testing. **Funding:** This work was supported by a UKRI MRC NIRG award (MR/R020787/1),  
466 a technology directorate voucher from the University of Liverpool, by the National Institute of Allergy and  
467 Infectious Diseases, National Institutes of Health, Department of Health and Human Services under grant  
468 number U19AI110820, and by both a Global Challenges Research Fund (GCRF) data and resources grant  
469 BBS/OS/GC/000009D and the BBSRC Core Capability Grant to the Earlham Institute BB/CCG1720/1.  
470 Next-generation sequencing and library construction were delivered via the BBSRC National Capability in  
471 Genomics and Single Cell (BB/CCG1720/1) at Earlham Institute, by members of the Genomics Pipelines  
472 Group. RJB is funded by a Biotechnology and Biological Sciences Research Council Doctoral Training  
473 Partnership studentship (BB/M011186/1). KSB is supported by a Wellcome Trust Clinical Research Career  
474 Development Award (106690/A/14/Z) and an Academy of Medical Sciences Springboard award  
475 (SBF002/1114), and is affiliated to the National Institute for Health Research Health Protection Research  
476 Unit (NIHR HPRU) in Gastrointestinal Infections at University of Liverpool in partnership with Public  
477 Health England (PHE) and collaboration with University of Warwick. The views expressed are those of the  
478 author(s) and not necessarily those of the NHS, the NIHR, the Department of Health and Social Care or  
479 Public Health England. **Competing interests:** The authors declare no competing interests. **Data and**  
480 **materials availability:**

## 481 **Author contributions**

482

483 R.J.B performed majority of the data analysis and interpretation of the results under the scientific guidance  
484 of K.S.B. A.J.S and D.J.R performed *in silico* protein antigens modelling and prediction of the impacts of  
485 amino acid substitutions on protein stability. C.V.P supported Bayesian Evolutionary Analysis by Sampling  
486 Trees. S.M.T. prepared and provided GEMS *Shigella* isolates and metadata. DR contributed to sample  
487 preparation. R.J.B and K.S.B drafted the manuscript. All authors contributed to editing of the manuscript.

**A**

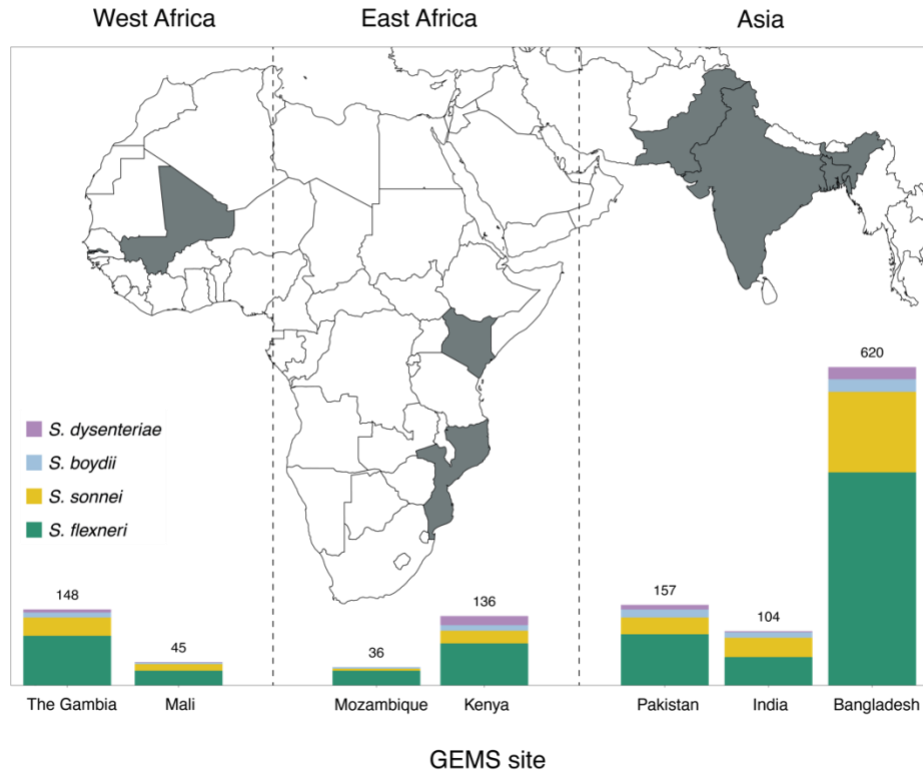

**B**

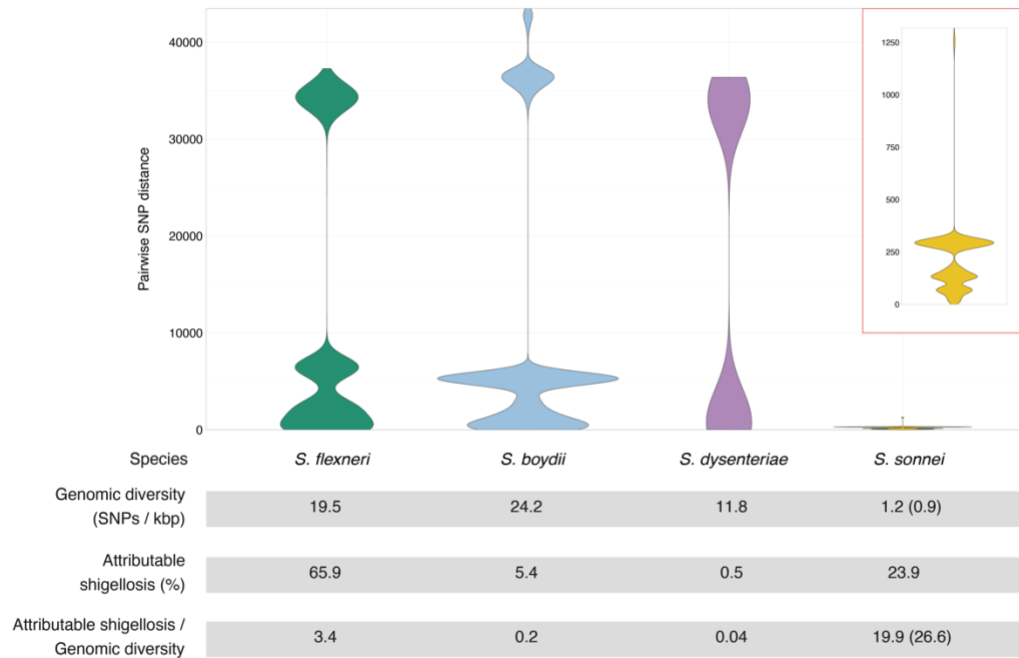

489 **Fig. 1. The diversity of *Shigella* spp. across seven LMIC.** (A) Stacked bar graphs illustrate the number  
490 of isolates from each *Shigella* spp. sequenced from GEMS and used in the current study, grouped by study  
491 sites. (B) Pairwise genomic distances (in SNPs) among *Shigella* isolates within subgroups are shown as  
492 violin plots. A magnified plot for *S. sonnei* is displayed inside the red box. The table below the plots  
493 demonstrates for each species the genomic diversity (as measure by total number of SNPs per kbp  
494 [methods]), the contribution to GEMS shigellosis burden and the shigellosis burden relative to genomic  
495 diversity. For *S. sonnei*, the genomic diversity and shigellosis burden relative to genomic diversity that was  
496 calculated excluding the two outliers are shown in bracket.

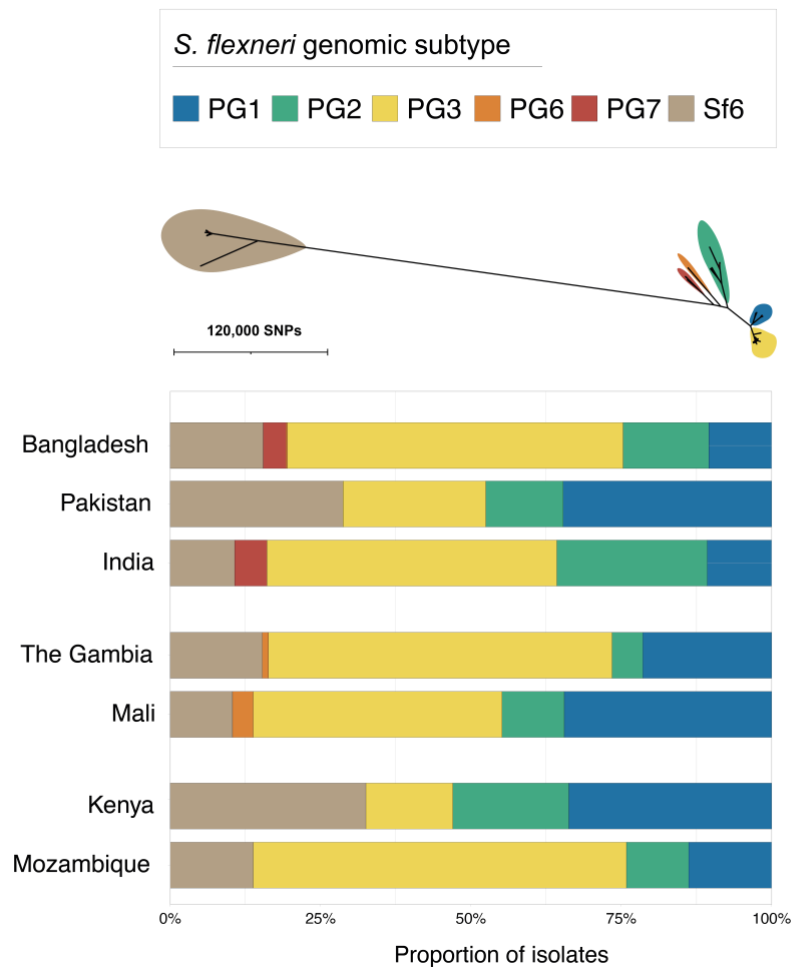

497

498 **Fig. 2. The diversity of *S. flexneri* genomic subtypes across seven GEMS study sites.** An unrooted ML  
499 phylogenetic tree of *S. flexneri* genomes identified six distinct genomic subtypes, each highlighted in a  
500 different colour according to the inlaid key displayed above the tree. The bar plot below the tree  
501 demonstrates the relative frequencies of the subtypes at each study site.

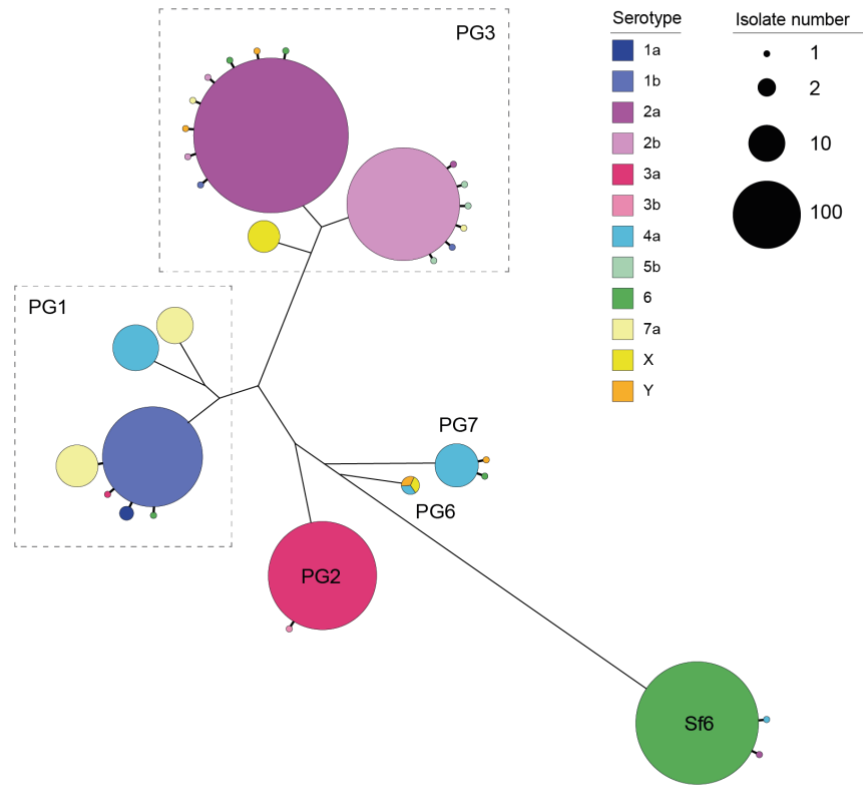

502 **Fig. 3. Diversity of *S. flexneri* population with respect to serotype switching.** The unrooted *S. flexneri*  
503 phylogenetic tree is shown with the five phylogroups (PG1-PG7) and Sf6 labeled accordingly. For each  
504 genomic subtype, monophyletic clusters of the dominant serotype are shown collapsed into bubbles  
505 coloured according to the inlaid key. Single isolates or groups of isolates within a subtype of an alternative  
506 serotype are represented by further branches, indicating a single serotype switch. The number of isolates  
507 within a single cluster is represented through bubble size.



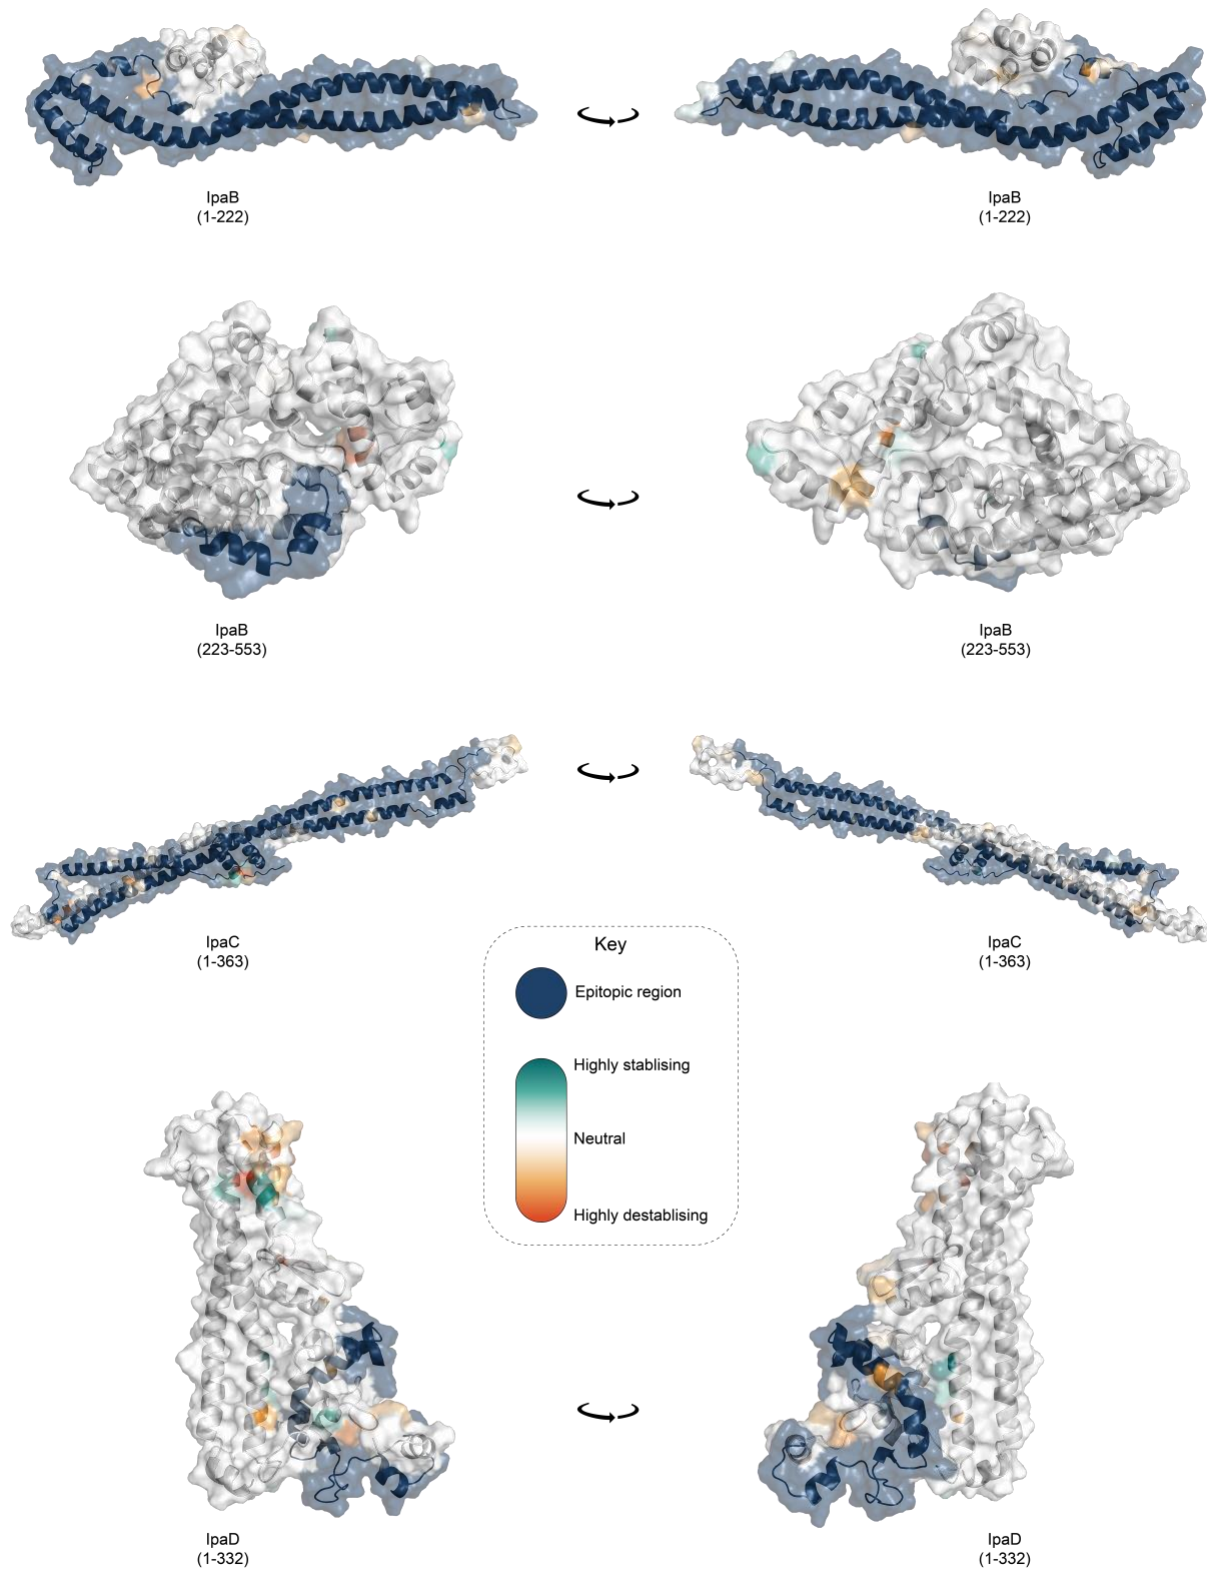

509 **Fig. 4. Visualization of mutations and its predicted effect on modeled IpaB, IpaC and IpaD protein**  
510 **antigens.** Visualisation of mutations on modelled proteins IpaB, IpaC and IpaD. The protein residue ranges  
511 modelled are shown in brackets. Blue region represents empirically determined epitopes. Mutations  
512 identified within the proteins are coloured using the scale shown in the inlaid key, where highly  
513 destabilising mutations are dark orange and highly stabilising mutations are dark green.

**A**

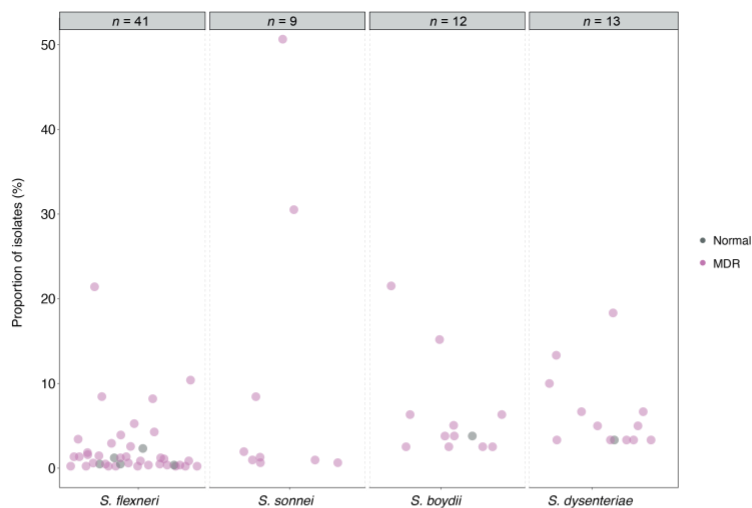

**B**

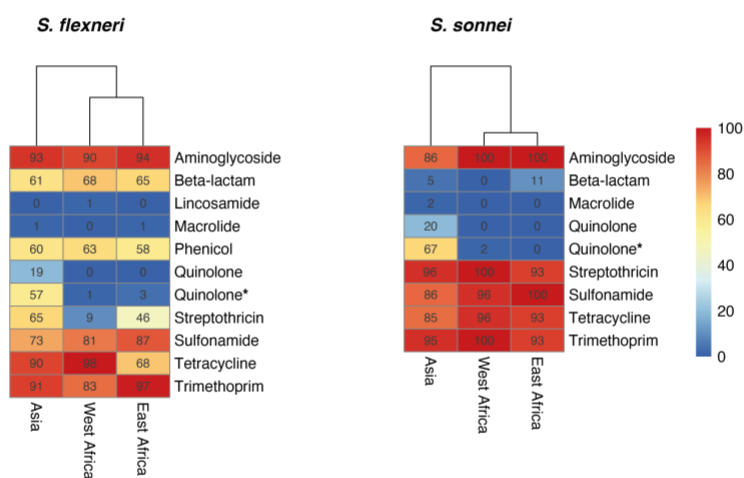

**C**

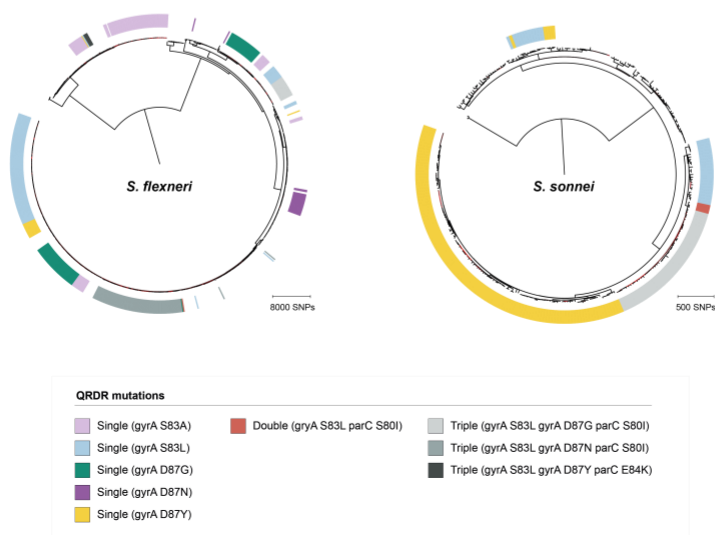

515 **Fig. 5. AMR genotypic profile diversity and convergent evolution of ciprofloxacin resistance. (A)**  
516 Frequencies of AMR genotypic profiles among *Shigella* spp. Each point in the scatterplot represents a  
517 unique AMR genotype profile: the proportion of isolates with a particular profile is displayed along the y-  
518 axis. Profiles identified in only a single isolate are not displayed. MDR genotypic profile conferring  
519 resistance or reduced suppressibility to three or more drug classes are highlighted in pink, and normal AMR  
520 genotype profile conferring resistance or reduced suppressibility in fewer than three drug classes are in  
521 grey. Numbers displayed above the plot represents the number of AMR genotype profiles plotted for each  
522 species. **(B)** Detection of known AMR genetic determinants associated with drug class grouped by country.  
523 Each cell in the heatmap represents the percentage of isolates from a region containing genetic determinants  
524 associated with resistance to a drug class. Genetic determinant conferring reduced susceptibility to  
525 quinolone is indicated with an asterisk. **(C)** The genetic convergent evolution of ciprofloxacin resistance in  
526 *S. flexneri* and *S. sonnei*. The presence of multiple monophyletic clades of QRDR mutations (single, double,  
527 or triple according to the inlaid key) conferring reduced susceptibility or resistance to ciprofloxacin is  
528 shown in the outer ring. B and C for *S. boydii* and *S. dysenteriae* are shown elsewhere (fig. S15).

529 **Table 1. *Shigella* antigen vaccine candidates examined in the current study.**

| <b>Vaccine candidate</b> | <b>Development stage</b> | <b>Location</b>                      | <b>Reference</b>                                                   |
|--------------------------|--------------------------|--------------------------------------|--------------------------------------------------------------------|
| IcsP (OmpP)              | Preclinical              | Virulence plasmid                    | Czerkinsky and Kim (37)                                            |
| SigA                     | Preclinical              | Chromosome<br>(pathogenicity island) | Czerkinsky and Kim (37)                                            |
| IpaB                     | Phase I                  | Virulence plasmid                    | Martinez-Beccera (16);<br>Riddle et al (83); Tribble et al<br>(84) |
| IpaC                     |                          |                                      |                                                                    |
| IpaD                     |                          |                                      |                                                                    |
| OmpA                     | Preclinical              | Chromosome                           | Pore <i>et al</i> (85)                                             |

530

**A**

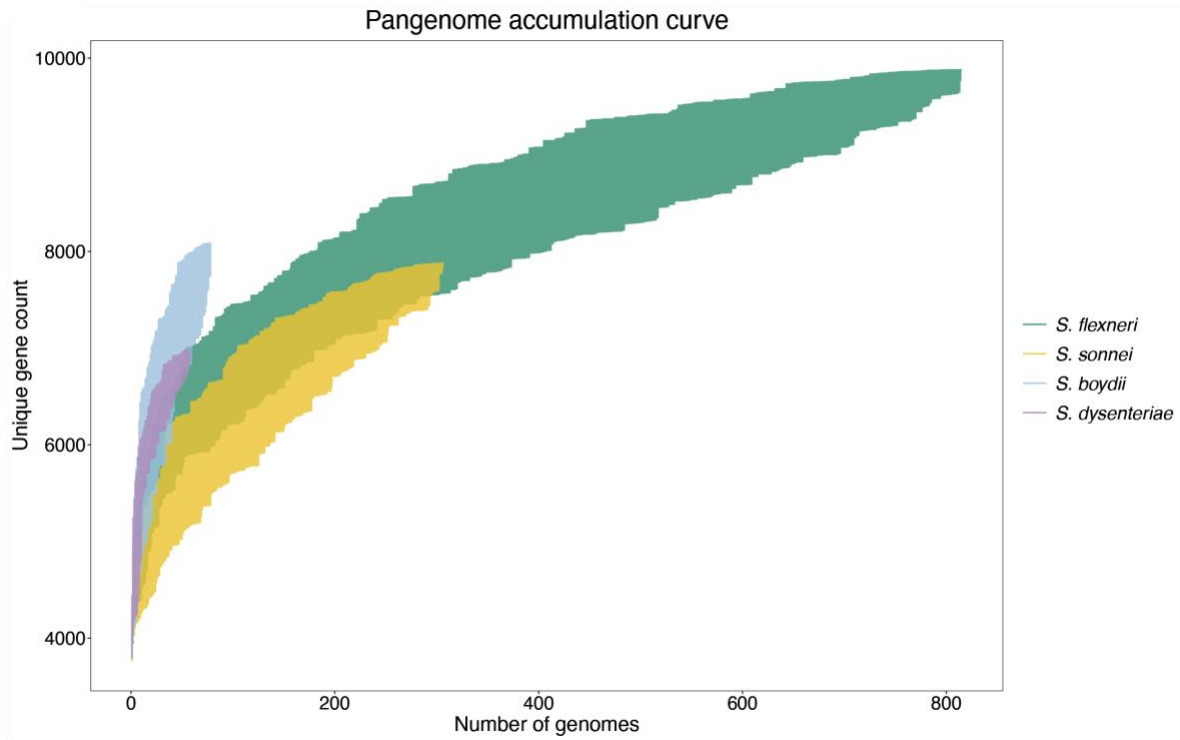

**B**

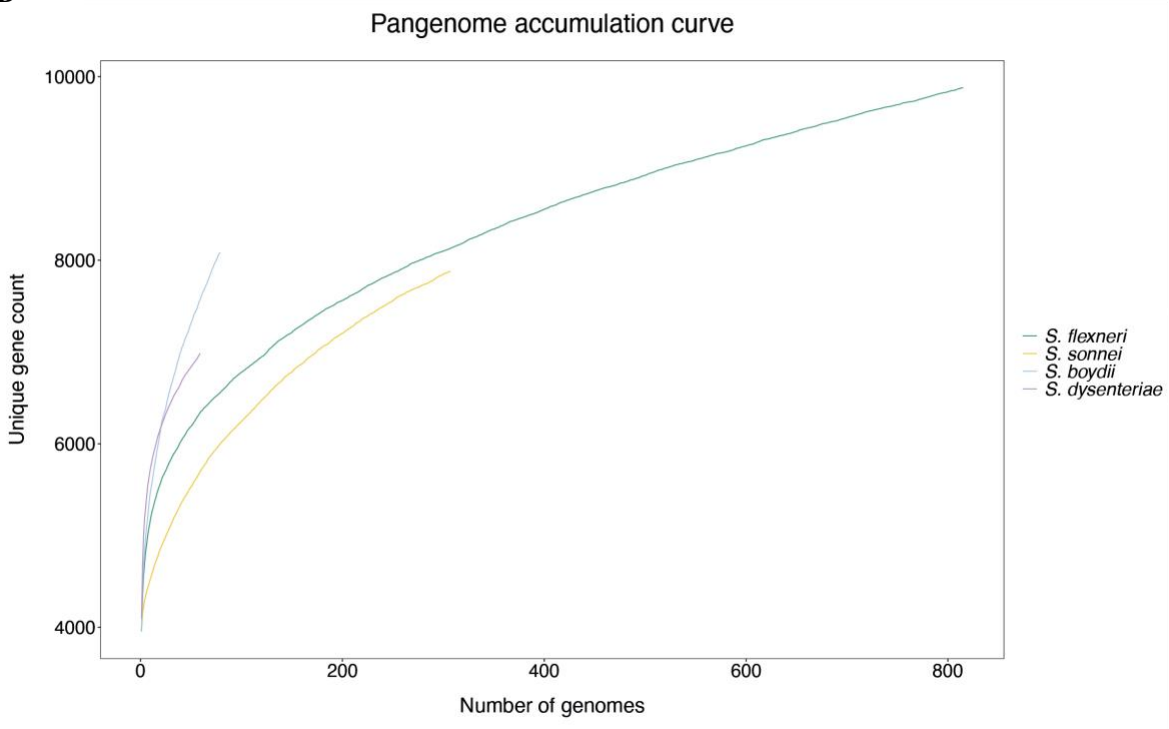



532 Fig. S1.

533 **Pangenome accumulation curve of *S. flexneri*, *S. sonnei*, *S. boydii* and *S. boydi*.** Each curve demonstrates  
534 the number of unique protein coding genes in the pangenome as a new genome is randomly added, with the  
535 number of genomes plotted along the x-axis. Random permutation of the data were subsampled 100 times,  
536 in which genomes are subsampled without replacement at each iteration. The y-axis shows the minimum  
537 and maximum range of unique gene count after each iteration in (A) and the mean value in (B).

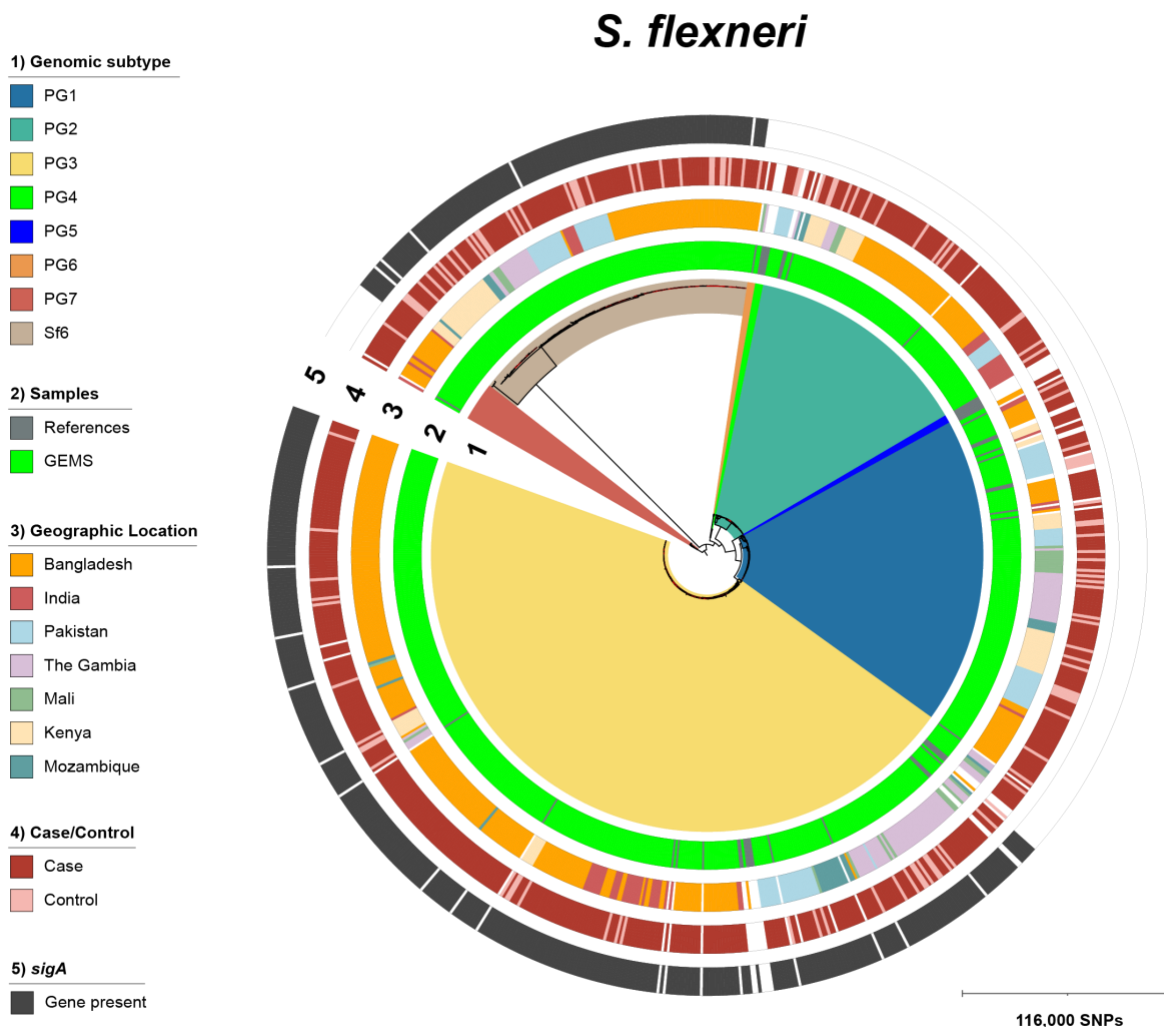

538

539 Fig. S2.

540 **Phylogeny of *S. flexneri* population from GEMS.** ML phylogenetic tree constructed using core genome  
541 SNPs from alignments of 817 *S. flexneri* genomes from GEMS and publicly available genomes. Tree was  
542 rooted using *E. coli* genome. The outer concentric rings illustrate different genotypic and epidemiological  
543 data according to the numbered inlaid keys displayed next to the tree. Scale bars represents the number of  
544 SNPs.

## *S. sonnei*

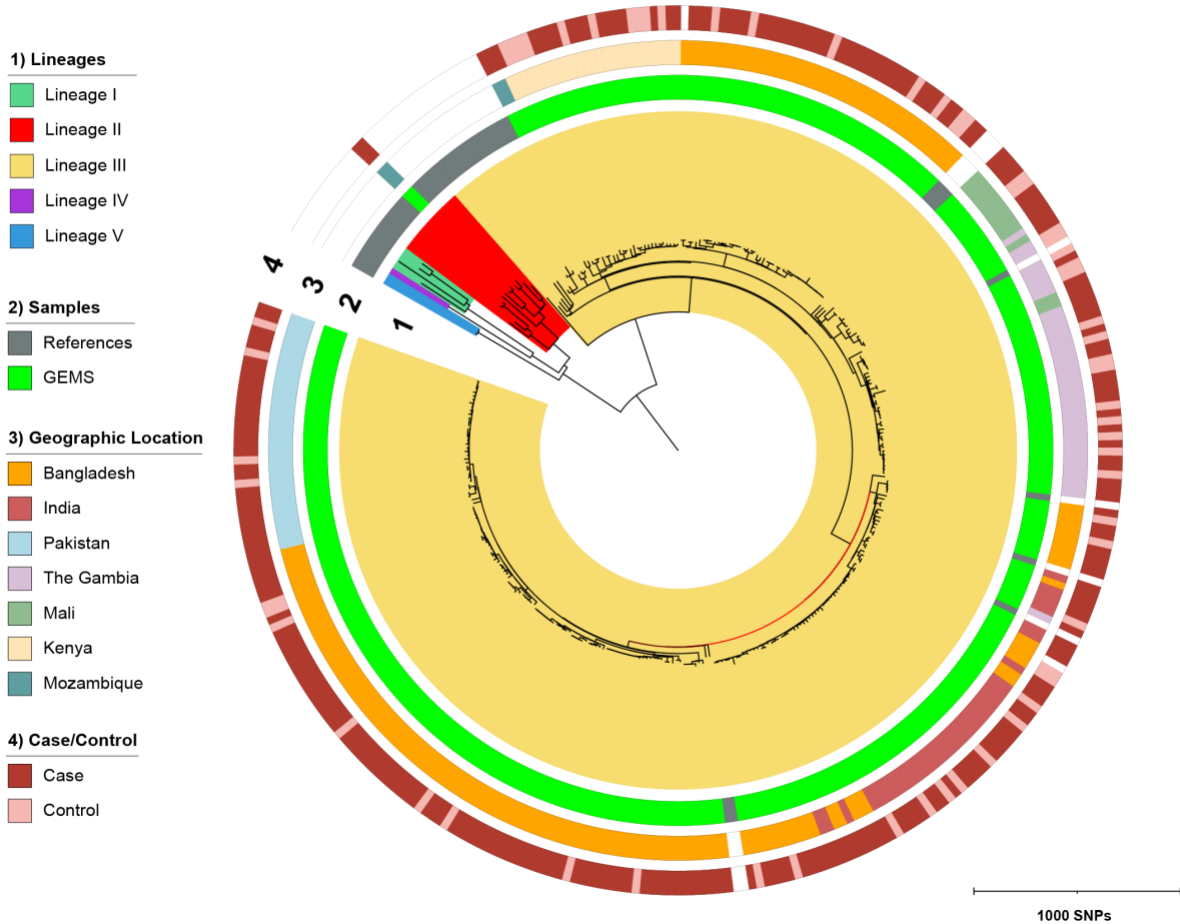

545

546 **Fig. S3.**

547 **Phylogeny of *S. sonnei* population from GEMS.** Midpoint rooted ML phylogenetic tree constructed using  
548 core genome SNPs from alignments of 308 *S. sonnei* genomes from GEMS and publicly available genomes.

A

### *S. boydii*

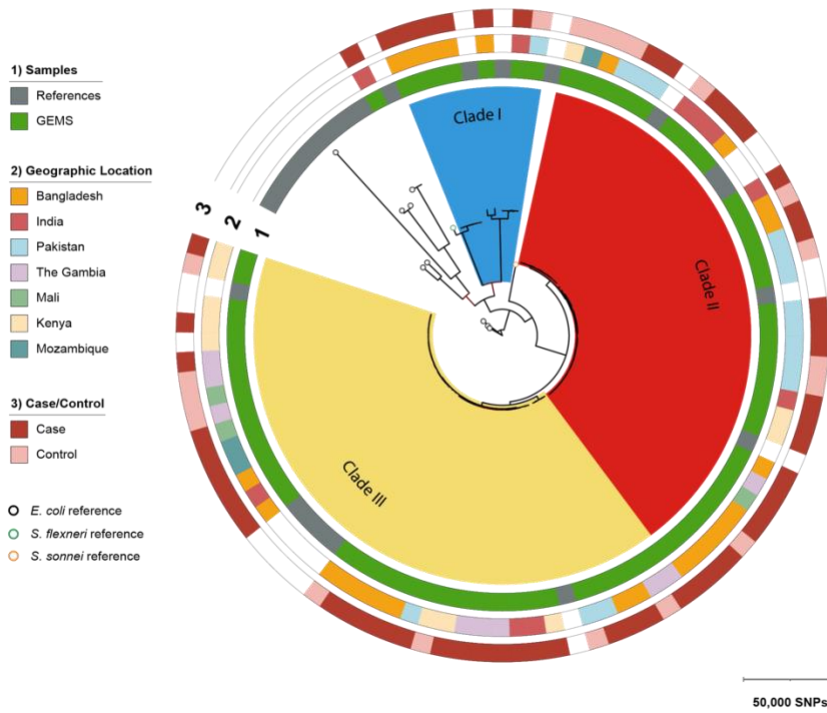

B

### *S. dysenteriae*

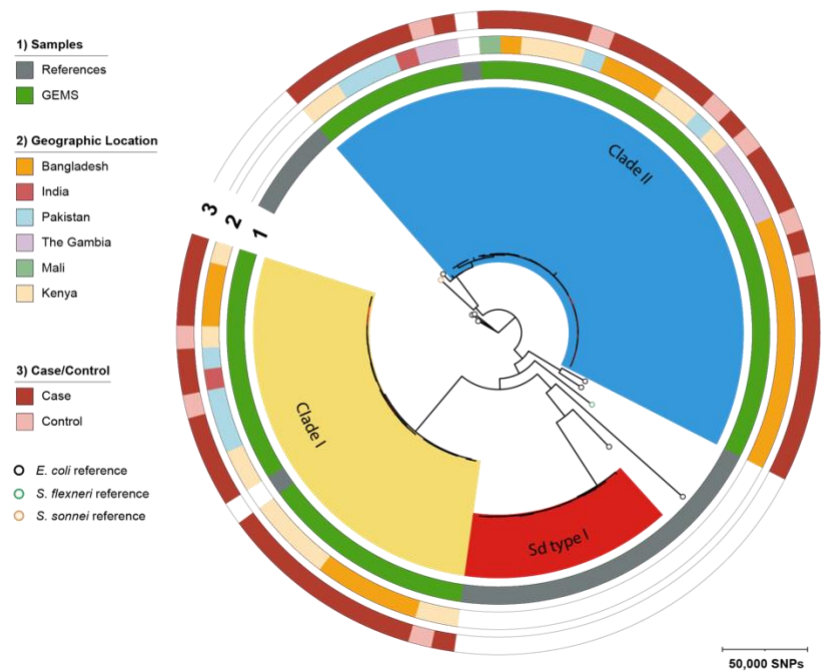

550 **Fig. S4.**

551 Phylogeny of *S. boydii* and *S. dysenteriae* population from GEMS. ML phylogenetic trees were constructed  
552 based on core genome SNPs outside region of recombination from alignments of (A) 79 *S. boydii* and (B)  
553 60 *S. dysenteriae* genomes from GEMS and publicly available genomes. Both trees were rooted using *E.*  
554 *coli* genome. Scale bar represent number of SNPs.

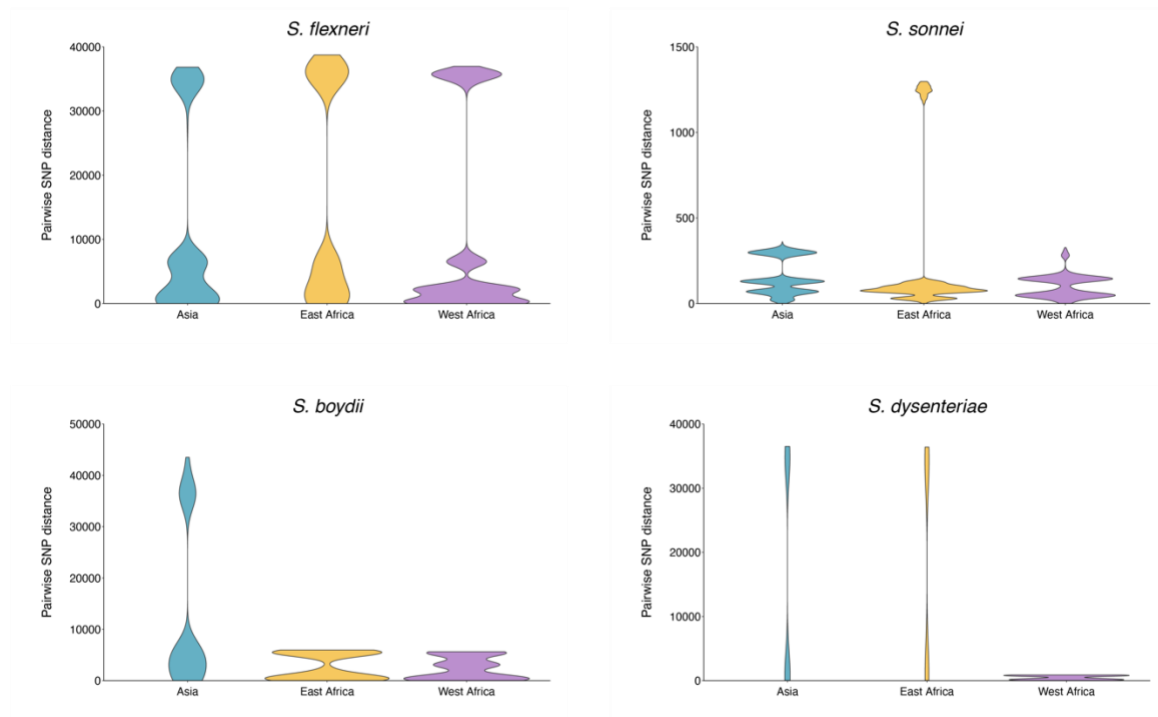

555

556 **Fig. S5.**

557 Regional diversity of Shigella spp. Comparison of genomic diversity, as measured by pairwise core SNP  
558 distance, across GEMS study sites (Asia: Bangladesh, India and Pakistan; East Africa: Kenya and  
559 Mozambique; West Africa: The Gambia and Mali) for *S. flexneri*, *S. sonnei*, *S. boydii* and *S. dysenteriae*.



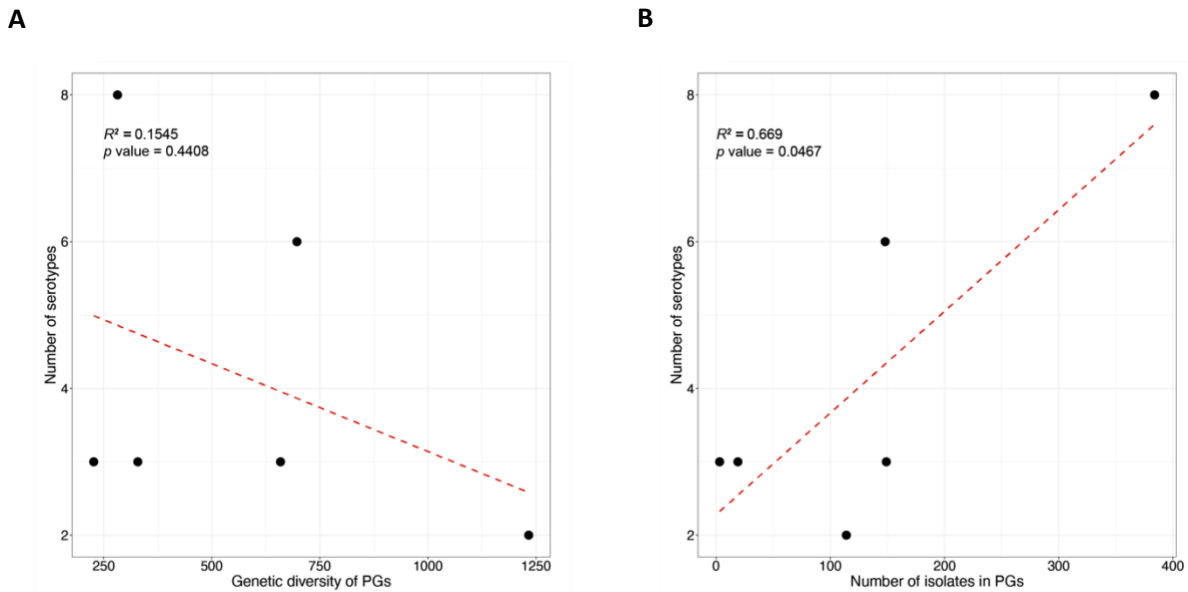

560

561 **Fig. S6.**

562 Association of *S. flexneri* serotype diversity with different properties of a genomic subtype. For each of the  
563 six subtypes identified among *S. flexneri* (PG1-PG7 and Sf6), the number of different serotypes is displayed  
564 along the y-axis and plotted against (A) the number of isolates within the subtype and (B) the genetic  
565 diversity of the subtype, as measured by pairwise core SNP distance and plotted along the x-axis. Linear  
566 regression analysis was performed to assess the association between serotype diversity and the different  
567 properties of subtypes. The regression coefficient of determination ( $R^2$ ) and  $p$ -value are displayed on the  
568 top left of each plot.

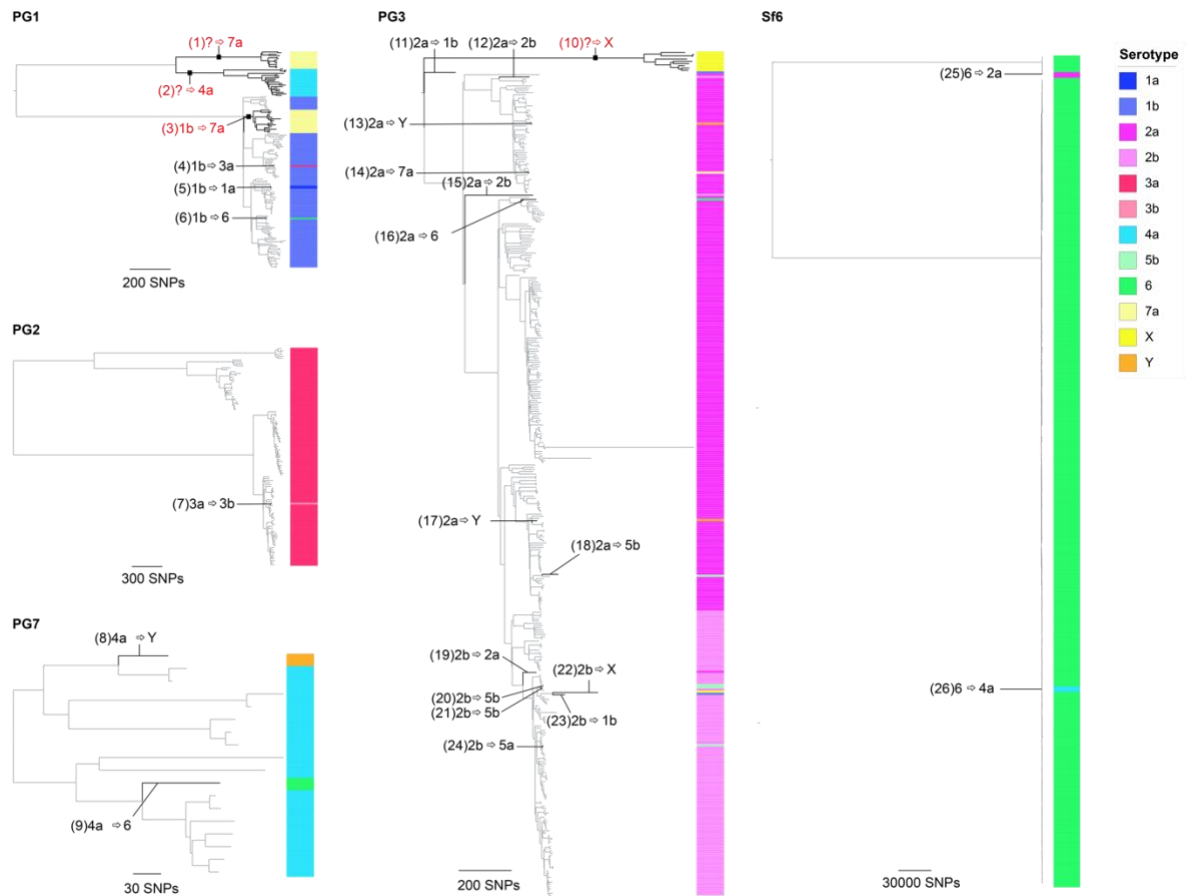

569

570 **Fig. S7.**

571 Serotype switching events across *S. flexneri* genomic subtypes. ML phylogenetic tree of each subtype was  
572 generated based on core genome SNPs. Serotypes determined through biochemical serotyping are displayed  
573 on the right-hand side of each tree, and coloured according to the inlaid key. The 26 inferred serotype  
574 switching events occurring along the phylogenetic branches are labelled accordingly. Numbers inside each  
575 brackets represents switch IDs, with further details provided in table S3. Where the dominant serotype  
576 cannot be determined, a question mark is displayed, indicating switch from unknown ancestral type.  
577 Serotype switching events resulting in more than two descendant isolates are highlighted in red.

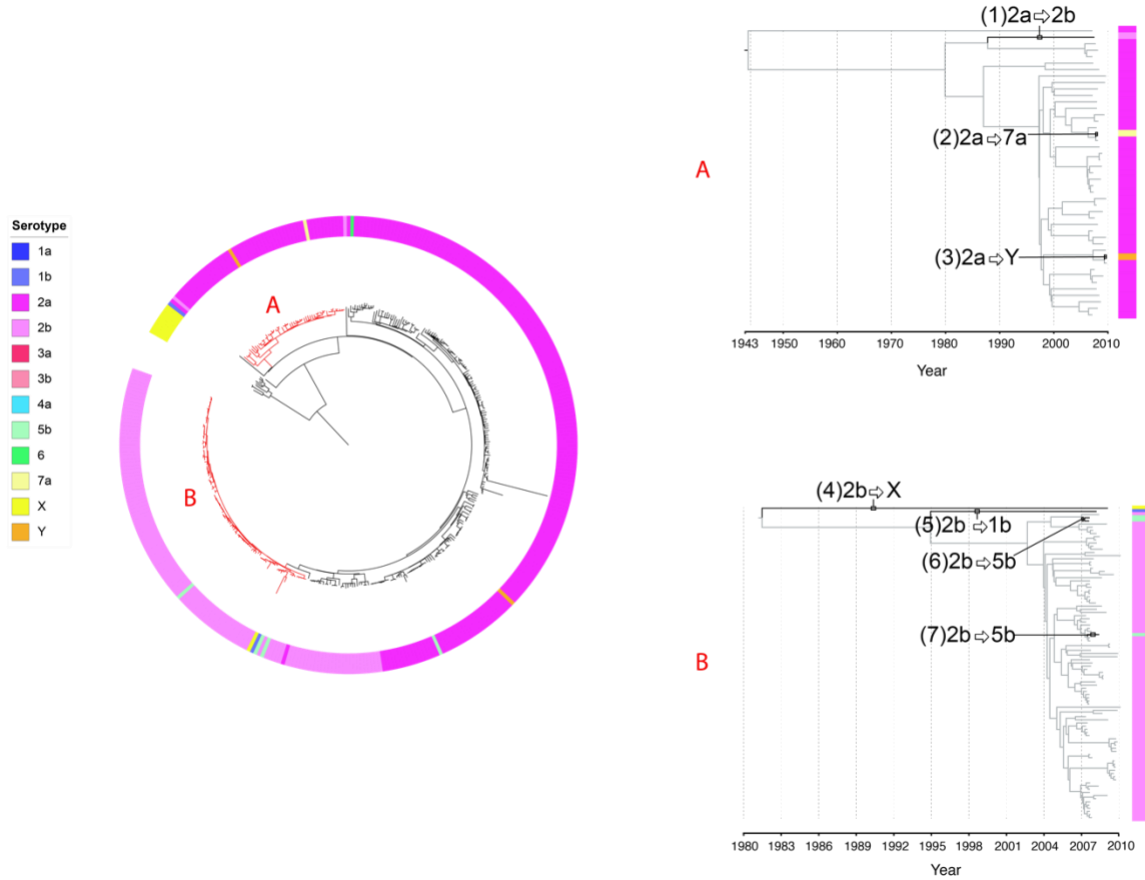

578

579 **Fig. S8.**

580 Estimation of time frame for serotype switching among *S. flexneri* PG3 isolates. ML phylogenetic tree of  
581 *S. flexneri* PG3 ( $n=384$ ) generated using core genome SNPs is displayed on the right. Isolate serotype is  
582 displayed on the outer ring, coloured according to the inlaid key displayed next to the tree. Two subclades  
583 with branches highlighted in red were selected for BEAST analysis. Maximum clade credibility trees based  
584 on two subclades within PG3 are displayed on the left. Independent switching events occurring along the  
585 various phylogenetic branches are highlighted in black, labelled and annotated. BEAST estimated time  
586 frame of divergence along the branches of the seven isolates that have undergone serotype switching are  
587 shown in table S5.

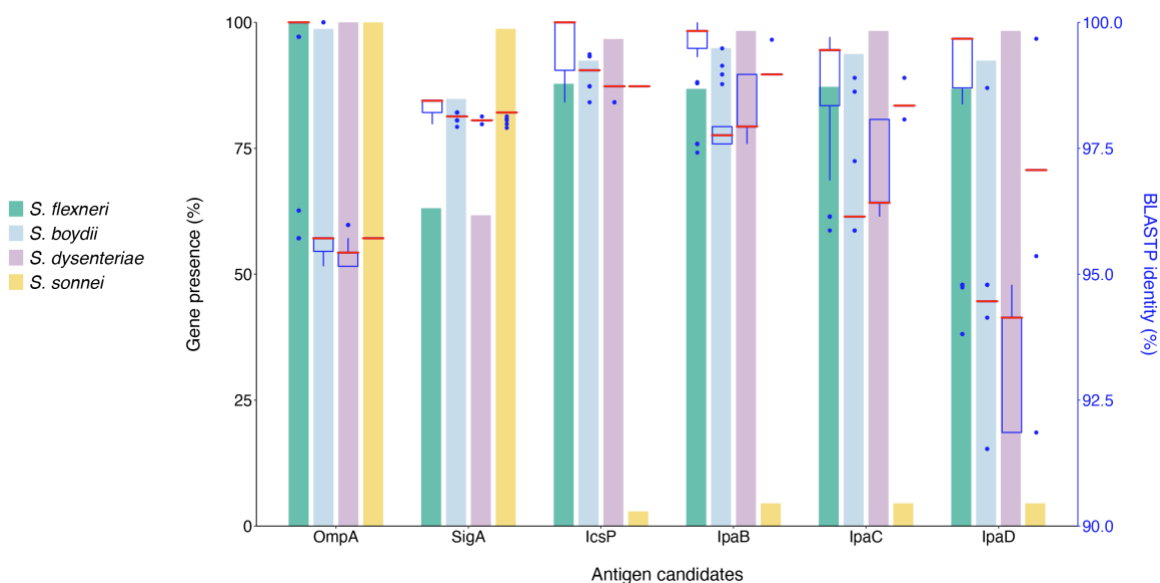

588

589 **Fig. S9.**

590 The distribution of vaccine antigen candidate and protein sequence identity among *Shigella* spp. (A)  
591 Lefthand y-axis refers to the grouped bar plot displaying presence of vaccine candidate genes identified  
592 among *Shigella* isolates from GEMS. Bars are grouped by genes and coloured according to species.  
593 Righthand y-axis (blue) refers to the boxplot displaying the interquartile range, median (red) and  
594 minimum/maximum pairwise percentage identity of the amino acid sequences of antigen vaccine  
595 candidates among GEMS, compared against the reference sequences. Presence of genes were identified  
596 using BLASTn search against draft genome assemblies and amino acid sequence percentage identity were  
597 inferred using BLASTp. (B) Mapping coverage of *Shigella* spp. virulence plasmid. Low percentage of  
598 virulence plasmid were detected among *S. sonnei* isolates, likely contributed by the fact that *S. sonnei*  
599 virulence plasmid is comparatively unstable and often lost during subculturing.

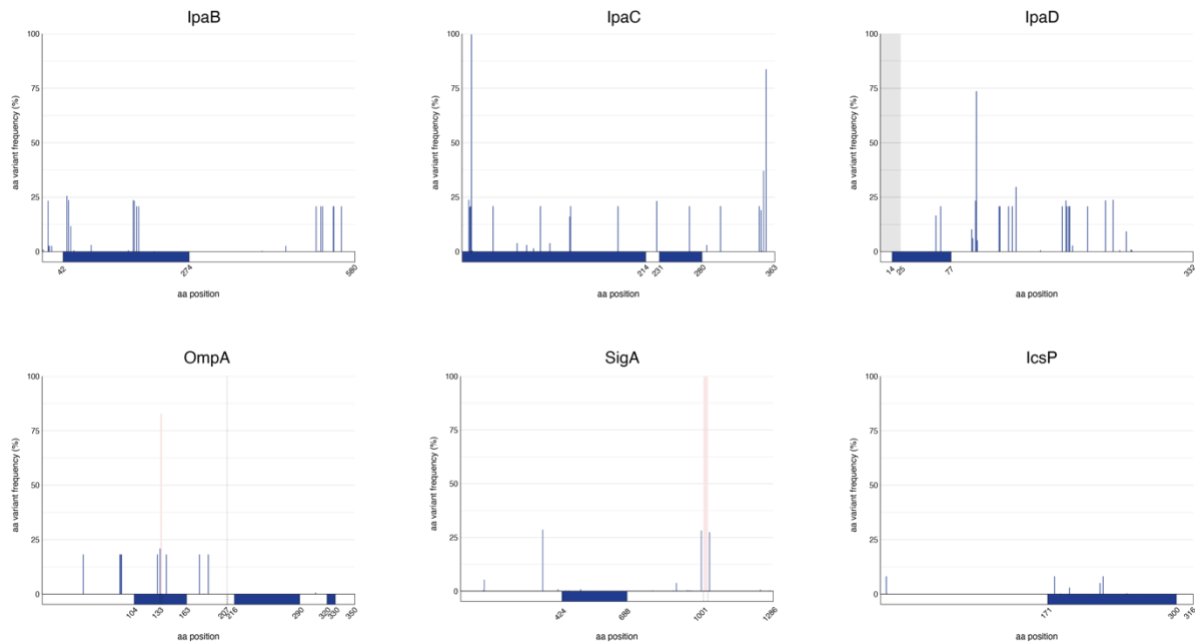

600

601 **Fig. S10.**

602 Frequency of amino acid variation among *S. flexneri* population for antigen vaccine candidates. Frequency  
603 of amino acid variations within *S. flexneri* genomes for the six vaccine candidate protein sequences. For  
604 each protein sequence, the proportion of genomes with the variant is shown along the y-axis with the  
605 position of the variant plotted along the x-axis. Grey bars highlight regions where there is a deletion and  
606 red bars highlight insertions. Schematic of the known epitope positions (in blue) for the protein sequences  
607 are displayed below the x-axis.

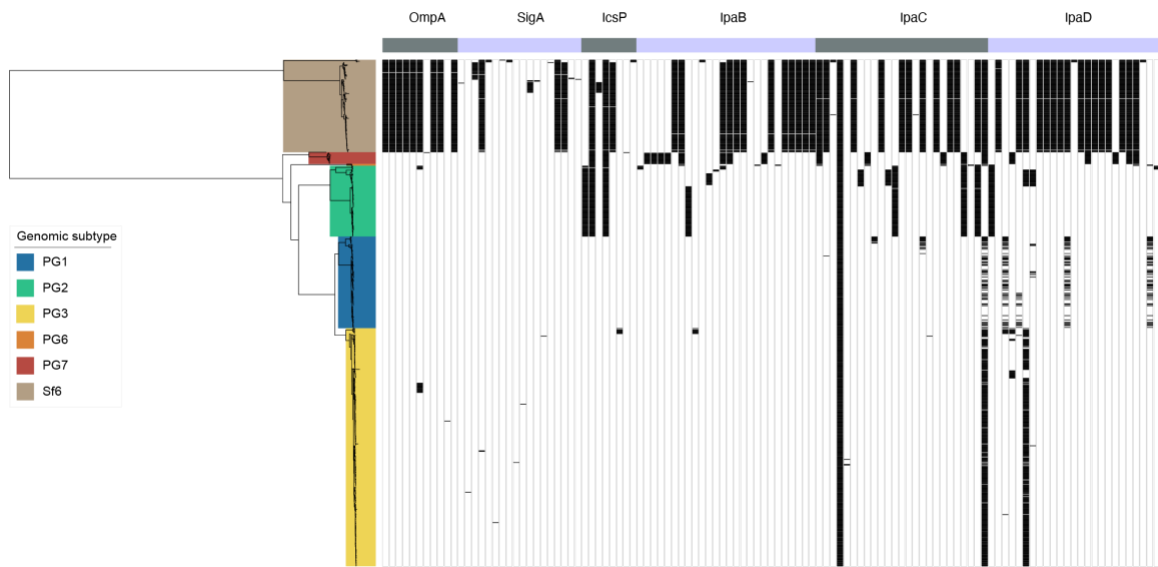

608

609 **Fig. S11.**

610 Vaccine antigen variation among *S. flexneri* subtypes. ML phylogenetic tree of 806 *S. flexneri* isolates based  
611 on core genome SNPs is displayed on the left, the six subtypes identified among the population are  
612 highlighted in different colours according to the inlaid key. The alternating grey and purple colour blocks  
613 displayed above the top panel represents the six antigen vaccine candidates assessed in the current study.  
614 The matrix in the centre demonstrates presence (in black) of aa variation for each antigen vaccine. Only  
615 variable sites are displayed.

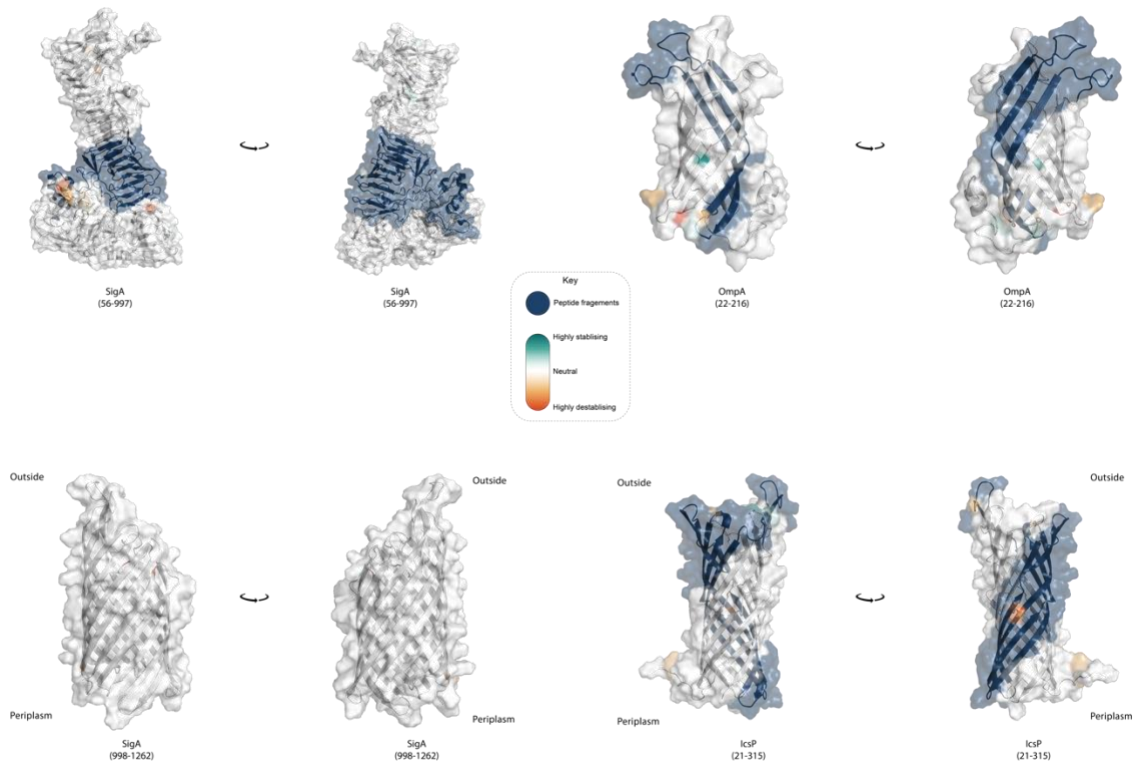

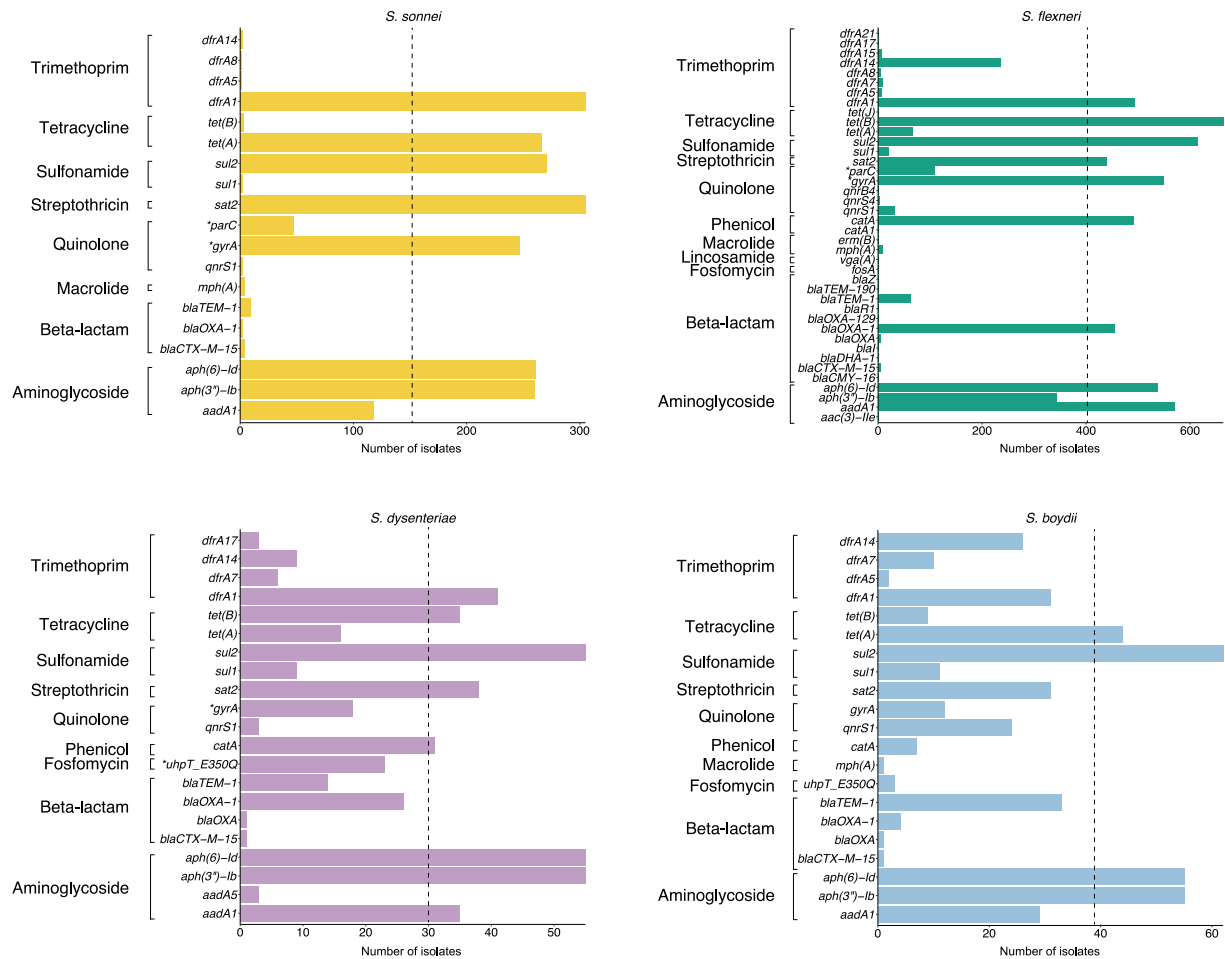

623

624 **Fig. S13.**

625 Prevalence of genetic determinants conferring AMR among *Shigella* spp. Bar plots shows the number of  
 626 genetic determinants detected in *S. sonnei*, *S. flexneri*, *S. dysenteriae* and *S. boydii* isolates that confer  
 627 resistance or reduced susceptibility to various antimicrobials. Genes and point mutations (indicated with an  
 628 asterisk) are plotted along the y-axis and grouped by drug class (displayed on the left). The dashed lines  
 629 highlight genetic determinants identified in half or more of the isolates for each species.





C

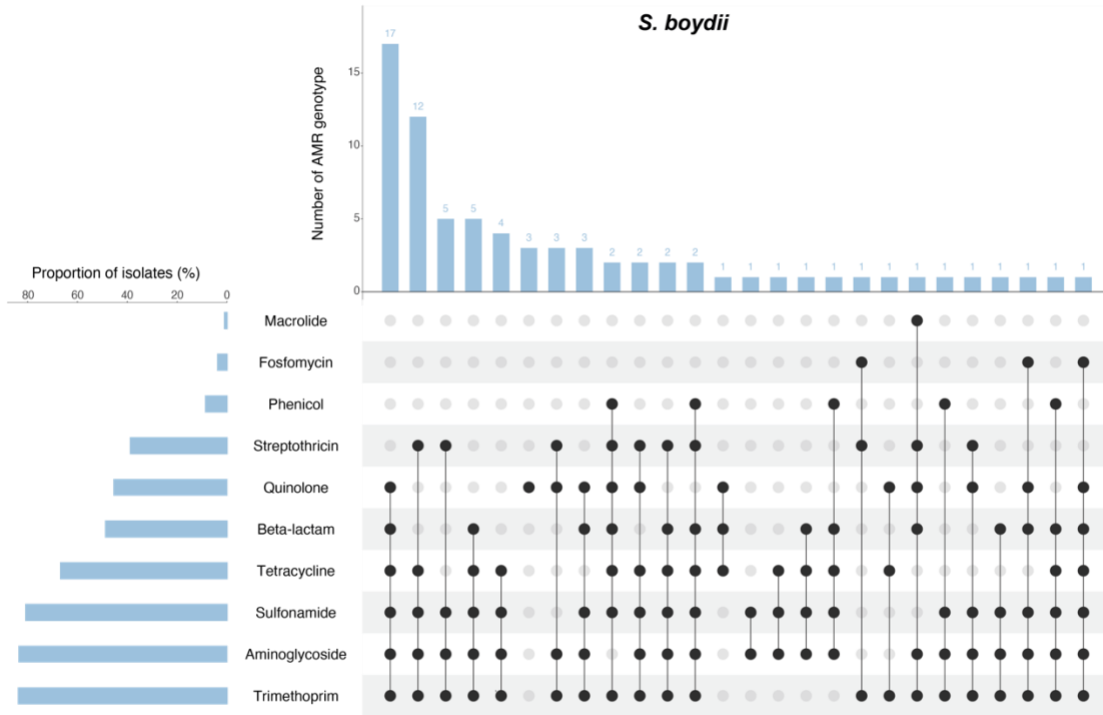

D

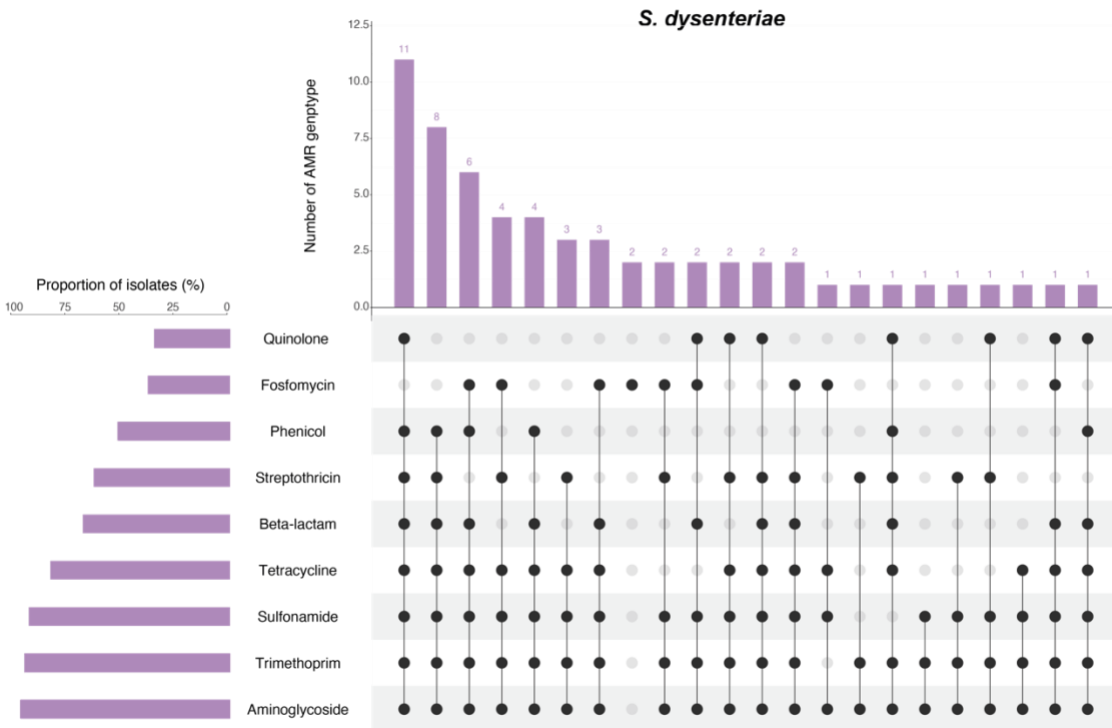

633 **Fig. S14.**

634 Diversity of AMR genotype resistance profiles. UpSet plots illustrate the AMR genotype resistance profiles  
635 for (A) *S. flexneri*, (B) *S. sonnei*, (C) *S. boydii* and (D) *S. dysenteriae*. Genotypic AMR profiles are shown  
636 in the combination matrix in the center panel. Each column represents a unique genotypic profile, where  
637 each black dot represents presence of a genetic determinant conferring resistance or reduced susceptibility  
638 to a drug class (displayed on the left). The vertical the bar plot above the matrix displays the number of  
639 isolates with a particular profile, with the exact number of isolates displayed above each bar. The horizontal  
640 bar plot on the left of the matrix illustrates the proportion of isolates containing AMR genetic determinants  
641 associated with a drug class.

A

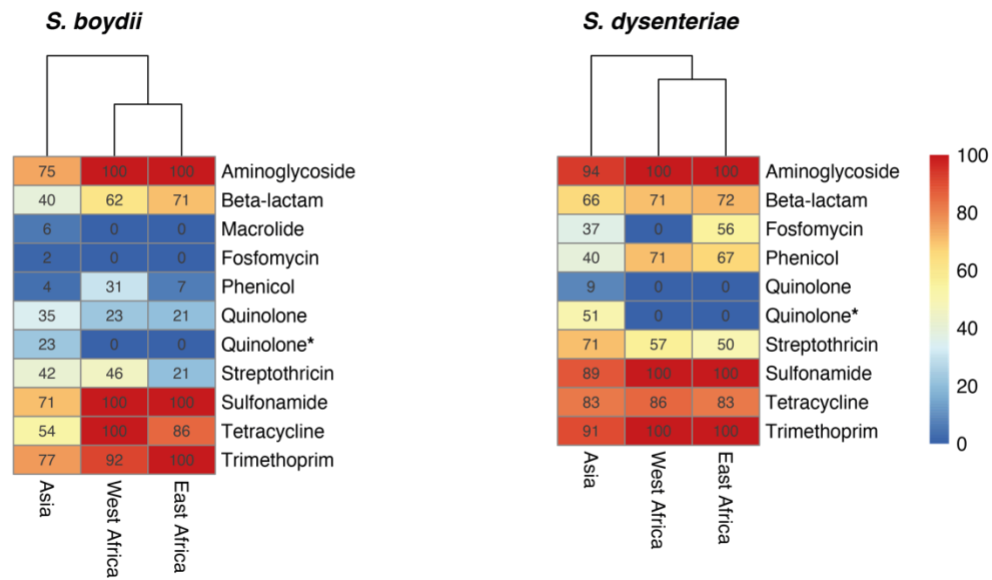

B

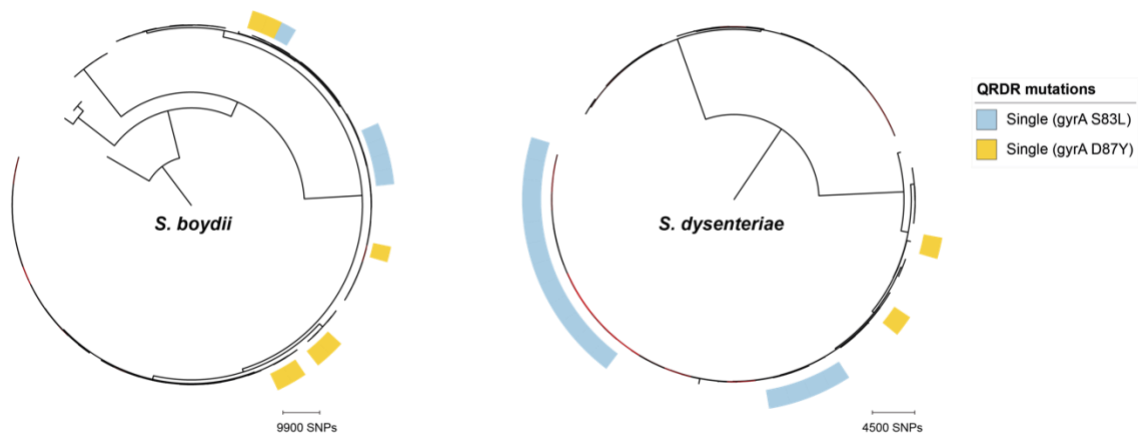

642

643 **Fig. S15.**

644 Detection of known AMR genetic determinants conferring resistance (reduced susceptibility marked with  
 645 asterisk) to various drug class, grouped by region (A) and convergent evolution of ciprofloxacin resistance  
 646 (B) for *S. boydii* and *S. dysenteriae*.

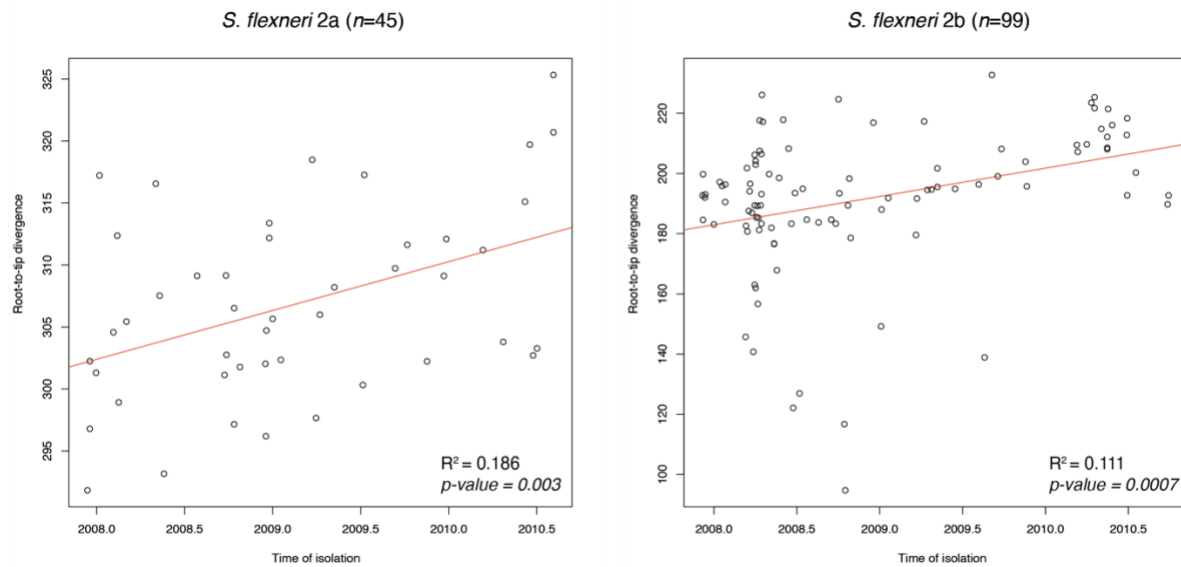

647

648 **Fig. S16.**

649 Temporal phylogenetic signal for *S. flexneri*. Correlation between isolate sampling time in months (x-axis)  
650 and phylogenetic root-to-tip divergence (y-axis), as estimated by TempEst based on ML phylogeny of each  
651 subclade. The two datasets correspond to *S. flexneri* 2a isolates belonging to node A (left) and *S. flexneri*  
652 2b isolates belonging to node B (right) from PG3 in fig. S8. The linear regression line is coloured in red,  
653 with the coefficient of determination ( $R^2$ ) and  $p$ -value displayed for each plot.

654 **Table S1.**  
655 **Details of *Shigella* isolates used in this study.** Includes accession numbers of the sequencing reads used  
656 in the study, *Shigella* serotype, assembly statistics, year and country of isolation, condition of the child  
657 (case/control) from which the isolate was derived from as defined by GEMS, genomic subtype, AMR genes  
658 and QRDR mutations.  
659  
660 See separate Excel file

661 **Table S2.**  
662 **Details of publicly available *E.coli/Shigella* genomes used in this study.**

| <b>Accession</b> | <b>strain</b> | <b>Species / serotype</b> | <b>Phylogroup/Lineage/subtype</b> |
|------------------|---------------|---------------------------|-----------------------------------|
| ERR028677        | 5417_1#4      | <i>S. sonnei</i>          | Central Asia III                  |
| ERR028679        | 5417_1#6      | <i>S. sonnei</i>          | Central Asia III                  |
| ERR024610        | 5008_7#5      | <i>S. sonnei</i>          | Central Asia III                  |
| ERR028705        | 5417_3#8      | <i>S. sonnei</i>          | Central Asia III                  |
| ERR024611        | 5008_7#6      | <i>S. sonnei</i>          | Central Asia III                  |
| ERR200544        | 8403_8#89     | <i>S. sonnei</i>          | V                                 |
| ERR200550        | 8403_8#95     | <i>S. sonnei</i>          | V                                 |
| ERR025737        | 5236_6#2      | <i>S. sonnei</i>          | IV                                |
| ERR025768        | 5236_8#9      | <i>S. sonnei</i>          | Global III                        |
| ERR316396        | 9803_4#91     | <i>S. sonnei</i>          | Global III                        |
| ERR200471        | 8403_8#16     | <i>S. sonnei</i>          | Global III                        |
| ERR025765        | 5236_8#6      | <i>S. sonnei</i>          | I                                 |
| ERR025722        | 5236_5#10     | <i>S. sonnei</i>          | I                                 |
| ERR024606        | 5008_7#11     | <i>S. sonnei</i>          | I                                 |
| ERR025754        | 5236_7#7      | <i>S. sonnei</i>          | I                                 |
| ERR025735        | 5236_6#10     | <i>S. sonnei</i>          | II                                |
| ERR025726        | 5236_5#3      | <i>S. sonnei</i>          | II                                |
| ERR028675        | 5417_1#2      | <i>S. sonnei</i>          | II                                |
| ERR028673        | 5417_1#11     | <i>S. sonnei</i>          | II                                |
| ERR025751        | 5236_7#4      | <i>S. sonnei</i>          | II                                |
| ERR025762        | 5236_8#3      | <i>S. sonnei</i>          | II                                |
| ERR025689        | 5236_1#5      | <i>S. sonnei</i>          | II                                |
| ERR025692        | 5236_1#8      | <i>S. sonnei</i>          | II                                |
| ERR025724        | 5236_5#12     | <i>S. sonnei</i>          | II                                |
| ERR028700        | 5417_3#3      | <i>S. sonnei</i>          | II                                |
| ERR028688        | 5417_2#2      | <i>S. sonnei</i>          | III                               |
| ERR025747        | 5236_7#10     | <i>S. sonnei</i>          | III                               |
| ERR025749        | 5236_7#2      | <i>S. sonnei</i>          | III                               |
| ERR025702        | 5236_2#5      | <i>S. sonnei</i>          | III                               |
| ERR025700        | 5236_2#3      | <i>S. sonnei</i>          | III                               |
| ERR025701        | 5236_2#4      | <i>S. sonnei</i>          | III                               |
| ERR025748        | 5236_7#11     | <i>S. sonnei</i>          | III                               |
| ERR028695        | 5417_2#9      | <i>S. sonnei</i>          | III                               |
| ERR025698        | 5236_2#12     | <i>S. sonnei</i>          | III                               |
| ERR316322        | 9803_4#17     | <i>S. sonnei</i>          | Latin America IIIa                |
| ERR212328        | 8489_1#60     | <i>S. sonnei</i>          | Latin America IIIa                |
| ERR316241        | 9789_6#32     | <i>S. sonnei</i>          | Latin America IIIa                |
| ERR025767        | 5236_8#8      | <i>S. sonnei</i>          | OJCA                              |
| ERR190834        | 8290_4#28     | <i>S. sonnei</i>          | OJCA                              |
| ERR319257        | 9870_7#10     | <i>S. sonnei</i>          | OJCA                              |

|                |             |                             |                              |
|----------------|-------------|-----------------------------|------------------------------|
| NC_007384      | Ss046       | <i>S. sonnei</i>            | III                          |
| LVIU01000110.1 | ASM164910v1 | <i>S. flexneri</i> 4s       |                              |
| NZ_CM001474.1  | M90T        | <i>S. flexneri</i> 5a       |                              |
| NC_004741.1    | 2457T       | <i>S. flexneri</i> 2a       |                              |
| ERR042803      | ERR042803   | <i>S. flexneri</i> 2a       | Phylogroup 3                 |
| ERR042850      | ERR042850   | <i>S. flexneri</i> 2a       | Phylogroup 3                 |
| ERR048281      | ERR048281   | <i>S. flexneri</i>          | Phylogroup 2                 |
| ERR048288      | ERR048288   | <i>S. flexneri</i>          | Phylogroup 6                 |
| ERR048302      | ERR048302   | <i>S. flexneri</i> 2a       | Phylogroup 3                 |
| ERR048305      | ERR048305   | <i>S. flexneri</i>          | Phylogroup 1                 |
| ERR048317      | ERR048317   | <i>S. flexneri</i>          | Phylogroup 7                 |
| ERR048339      | ERR048339   | <i>S. flexneri</i> 2a       | Phylogroup 3                 |
| ERR126987      | ERR126987   | <i>S. flexneri</i> 2a       | Phylogroup 3                 |
| ERR126993      | ERR126993   | <i>S. flexneri</i>          | Phylogroup 2                 |
| ERR127032      | ERR127032   | <i>S. flexneri</i> 1a       | PHE type strain              |
| ERR127033      | ERR127033   | <i>S. flexneri</i> 1b       | PHE type strain              |
| ERR127034      | ERR127034   | <i>S. flexneri</i> 1c       | PHE type strain              |
| ERR127035      | ERR127035   | <i>S. flexneri</i> 2a       | PHE type strain              |
| ERR127036      | ERR127036   | <i>S. flexneri</i> 2b       | PHE type strain              |
| ERR127037      | ERR127037   | <i>S. flexneri</i> 3a       | PHE type strain              |
| ERR127038      | ERR127038   | <i>S. flexneri</i> 3b       | PHE type strain              |
| ERR127039      | ERR127039   | <i>S. flexneri</i> 3c       | PHE type strain              |
| ERR127040      | ERR127040   | <i>S. flexneri</i> 4a       | PHE type strain              |
| ERR127041      | ERR127041   | <i>S. flexneri</i> 4b       | PHE type strain              |
| ERR127043      | ERR127043   | <i>S. flexneri</i> 5a       | PHE type strain              |
| ERR127044      | ERR127044   | <i>S. flexneri</i> 5b       | PHE type strain              |
| ERR127046      | ERR127046   | <i>S. flexneri</i>          | Phylogroup 4                 |
| ERR127047      | ERR127047   | <i>S. flexneri</i> Y        | PHE type strain              |
| ERR127048      | ERR127048   | <i>S. flexneri</i><br>E1037 | PHE type strain              |
| ERR1363976     | ERR1363976  | <i>S. flexneri</i> 2a       | Phylogroup 3 Central Asia    |
| ERR1364007     | ERR1364007  | <i>S. flexneri</i> 2a       | Phylogroup 3 Central Asia    |
| ERR1364014     | ERR1364014  | <i>S. flexneri</i> 2a       | Phylogroup 3 Minor MSM clade |
| ERR1364050     | ERR1364050  | <i>S. flexneri</i> 2a       | Phylogroup 3 Minor MSM clade |
| ERR1364087     | ERR1364087  | <i>S. flexneri</i> 2a       | Phylogroup 3 Central Asia    |
| ERR1364097     | ERR1364097  | <i>S. flexneri</i> 2a       | Phylogroup 1 Central Asia    |
| ERR1364106     | ERR1364106  | <i>S. flexneri</i> 2a       | Phylogroup 3 Major MSM clade |
| ERR1364137     | ERR1364137  | <i>S. flexneri</i> 2a       | Phylogroup 3 Major MSM clade |
| ERR200376      | ERR200376   | <i>S. flexneri</i> 2a       | Phylogroup 3                 |
| ERR217085      | ERR217085   | <i>S. flexneri</i>          | Phylogroup 1                 |



|                 |                                |                              |                         |
|-----------------|--------------------------------|------------------------------|-------------------------|
| ERR449043       | ERR449043                      | <i>S. flexneri</i> 3a        | MSM-outbreak associated |
| ERR449077       | ERR449077                      | <i>S. flexneri</i> 3a        | MSM-outbreak associated |
| ERR559526       | ERR559526                      | <i>S. flexneri</i> 2a        | NCTC1                   |
| ERR832464       | ERR832464                      | <i>S. flexneri</i>           | Phylogroup 5            |
| ERR832481       | ERR832481                      | <i>S. flexneri</i>           | Phylogroup 3            |
| SRR7886341      | SRR7886341                     | <i>S. flexneri</i>           | MSM associated          |
| NC_017328.1     | ASM2224v1                      | <i>S. flexneri</i>           |                         |
| NC_004337       | <i>S. flexneri</i> 2a str. 301 | <i>S. flexneri</i> 2a        | Phylogroup 3            |
| NC_007606       | <i>S. dysenteriae</i> Sd197    | <i>S. dysenteriae</i>        |                         |
| ERR1013692      | ERR1013692                     | <i>S. dysenteriae</i> type 1 | IV                      |
| ERR1013770      | ERR1013770                     | <i>S. dysenteriae</i> type 1 | IIIa                    |
| ERR1014006      | ERR1014006                     | <i>S. dysenteriae</i> type 1 | III d                   |
| ERR1014139      | ERR1014139                     | <i>S. dysenteriae</i> type 1 | III c                   |
| ERR1014187      | ERR1014187                     | <i>S. dysenteriae</i> type 1 | IV                      |
| ERR1014220      | ERR1014220                     | <i>S. dysenteriae</i> type 1 | II                      |
| ERR1014530      | ERR1014530                     | <i>S. dysenteriae</i> type 1 | III c                   |
| ERR1014532      | ERR1014532                     | <i>S. dysenteriae</i> type 1 | III d                   |
| ERR1014536      | ERR1014536                     | <i>S. dysenteriae</i> type 1 | I                       |
| ERR1014541      | ERR1014541                     | <i>S. dysenteriae</i> type 1 | II                      |
| ERR1014551      | ERR1014551                     | <i>S. dysenteriae</i> type 1 | III b                   |
| ERR279284       | ERR279284                      | <i>S. dysenteriae</i> type 1 | II                      |
| GCA_000268105   | SD_225-75                      | <i>S. dysenteriae</i> type 2 | S1                      |
| GCF_000815495   | SD_S6205                       | <i>S. dysenteriae</i> type 2 | S3                      |
| ERR200454       | SB_K-11124                     | <i>S. boydii</i> (ST 1767)   |                         |
| NZ_AMKG01000009 | 248-1B                         | <i>S. boydii</i>             | 3                       |
| NC_010658       | 3083-94                        | <i>S. boydii</i>             | 2                       |
| AMJZ00000000    | SB_08_0009                     | <i>S. boydii</i>             | 3                       |
| AMKA00000000    | SB_08_0280                     | <i>S. boydii</i>             | 2                       |

|              |            |                               |   |
|--------------|------------|-------------------------------|---|
| AMKB00000000 | SB_08_2671 | <i>S. boydii</i>              | 3 |
| AMKC00000000 | SB_08_2675 | <i>S. boydii</i>              | 2 |
| AMKD00000000 | SB_08_6341 | <i>S. boydii</i>              | 2 |
| AMKE00000000 | SB_09_0344 | <i>S. boydii</i>              | 2 |
| AFGC00000000 | SB_3594-74 | <i>S. boydii</i>              | 3 |
| AKNB00000000 | SB_4444-74 | <i>S. boydii</i>              | 3 |
| AFGE00000000 | SB_5216-82 | <i>S. boydii</i>              | 1 |
| AKNA00000000 | SB_965-58  | <i>S. boydii</i>              | 1 |
| AMJX00000000 | SB_S7334   | <i>S. boydii</i>              | 3 |
| NC_010658    | 3083-94    | <i>S. boydii</i>              |   |
| AAJT00000000 | B7A        | <i>E. coli</i>                |   |
| AM946981     | BL21(DE3)  | <i>E. coli</i> O7             |   |
| NC_009801    | E24377A    | <i>E. coli</i><br>O139:H28    |   |
| SRR2169557   | IAI1-117   | <i>E. coli</i> O8             |   |
| SRR306102    | K12-W3110  | <i>E. coli</i> O16            |   |
| NC_011751    | UMN026     | <i>E. coli</i><br>O17:K52:H18 |   |
| NC_013941    | CB9615     | <i>E. coli</i> O55:H7         |   |

663

664 **Table S3.**  
665 **Association of *S. flexneri* genomic subtype / serotype with case status.**

| <b>Genomic subtype / serotype</b> | <b>OR</b> | <b>95% CI</b>    | <b>z statistic</b> | <b>p-value</b> |
|-----------------------------------|-----------|------------------|--------------------|----------------|
| Sf6                               | 0.5043    | 0.3198 - 0.7953  | 2.945              | 0.0032         |
| PG1                               | 0.5773    | 0.3619 - 0.9211  | 2.305              | 0.0212         |
| PG2                               | 0.8926    | 0.5102 - 1.5616  | 0.398              | 0.6906         |
| PG3                               | 2.3196    | 1.5051 - 3.5748  | 3.813              | 0.0001         |
| PG6                               | 1.1339    | 0.0582 - 22.1005 | 0.083              | 0.9339         |
| PG7                               | 2.9426    | 0.3889 - 22.2638 | 1.045              | 0.2959         |
| 1a                                | 0.8088    | 0.0386 - 16.9574 | 0.137              | 0.8913         |
| 1b                                | 0.6867    | 0.3942 - 1.1961  | 1.328              | 0.1843         |
| 2a                                | 1.9329    | 1.1712 - 3.1900  | 2.578              | 0.0099         |
| 2b                                | 2.2614    | 1.1117 - 4.5997  | 2.252              | 0.0243         |
| 3a                                | 0.8926    | 0.5102 - 1.5616  | 0.398              | 0.6906         |
| 4a                                | 0.7946    | 0.3230 - 1.9548  | 0.501              | 0.6167         |
| 5b                                | 0.4798    | 0.0495 - 4.6540  | 0.633              | 0.5264         |
| 6                                 | 0.4829    | 0.3072 - 0.7590  | 3.155              | 0.0016         |
| 7a                                | 0.6029    | 0.2399 - 1.5151  | 1.076              | 0.2818         |
| Y                                 | 1.46      | 0.0781 - 27.3032 | 0.253              | 0.8001         |
| X                                 | 1.6157    | 0.2048 - 12.7458 | 0.455              | 0.6489         |

666

667 **Table S4.**

668

669 Details of serotype determining genes facilitating *S. flexneri* (n=72) serotype switching.

670

671

672 See separate Excel file

673 **Table S5.**  
674 **BEAST estimated timeframe for serotype switching among *S. flexneri* PG3 isolates.**

675

| Switch ID# | Subclade <sup>¶</sup> | Serotype change | Molecular serotype gene detected <sup>&amp;</sup> | Median branch length (days) <sup>§</sup> | 95% HPD branch length (days) |
|------------|-----------------------|-----------------|---------------------------------------------------|------------------------------------------|------------------------------|
| 3          | A                     | 2a → Y          | -                                                 | 159                                      | 16 - 344                     |
| 2          | A                     | 2a → 7a         | <i>gtrII</i>                                      | 154                                      | 27 - 307                     |
| 1          | A                     | 2a → 2b         | <i>gtrII</i> , <i>gtrX</i>                        | 7203                                     | 4792 - 10009                 |
| 7          | B                     | 2b → 5b         | <i>gtrII</i> , <i>gtrX</i>                        | 348                                      | 244 - 479                    |
| 6          | B                     | 2b → 5b         | <i>gtrII</i> , <i>gtrX</i>                        | 254                                      | 134 - 491                    |
| 5          | B                     | 2b → 1b         | <i>gtrI</i> , <i>gtrII</i> ,<br><i>Oac1b</i>      | 4888                                     | 2962 - 7114                  |
| 4          | B                     | 2b → X          | <i>gtrX</i> , <i>gtrII</i>                        | 10206                                    | 5494 - 15408                 |

676

677 Footnotes:

678 <sup>#</sup> Serotype switching event labelled according to Fig S8

679 <sup>¶</sup> Phylogenetic subclade isolate belong to

680 <sup>&</sup> Presence of serotype determining genes, as detected by ShigaTyper, - indicates no genes were detected.

681 <sup>§</sup> Phylogenetic branch length represents divergence time, predicted by BEAST and inferred from a time-  
682 scaled tree.

**Table S6.**

**An overview of the protein modelling.** Table includes information about the antigen candidates modelled, the range of residues the proteins were modelled over, homologues used in template modelling and the QMEAN method and score.

| <b>Species</b>     | <b>Antigen candidates</b> | <b>Phylogroup</b> | <b>Serotype</b> | <b>Start</b> | <b>Finish</b> | <b>Homolog</b> | <b>Sequence Identity</b> | <b>QMEAN method</b> | <b>Average local QMEAN score</b> |
|--------------------|---------------------------|-------------------|-----------------|--------------|---------------|----------------|--------------------------|---------------------|----------------------------------|
| <i>S. flexneri</i> | OmpA                      | PG3               | 5A              | 22           | 216           | 1QJP           | 93%                      | QMEANDisCo          | 0.46                             |
| <i>S. flexneri</i> | OmpA                      | PG3               | 5A              | 349          | 490           | 1R1M           | 41%                      | QMEANDisCo          | 0.31                             |
| <i>S. flexneri</i> | SigA                      | PG3               | 2A              | 56           | 997           | 3SZE           | 44%                      | QMEANDisCo          | 0.71                             |
| <i>S. flexneri</i> | SigA                      | PG3               | 2A              | 998          | 1262          | 2QOM           | 85%                      | QMEANDisCo          | 0.83                             |
| <i>S. flexneri</i> | IcsP                      | PG3               | 5A              | 21           | 315           | 1I78           | 60%                      | QMEANDisCo          | 0.81                             |
| <i>S. flexneri</i> | IpaB                      | PG3               | 5A              | 1            | 222           | 3U0C           | 76%                      | QMEANBrane          | 0.83                             |
| <i>S. flexneri</i> | IpaB                      | PG3               | 5A              | 223          | 553           | 3WXX           | 19%                      | QMEANBrane          | 0.79                             |
| <i>S. flexneri</i> | IpaC                      | PG3               | 5A              | 1            | 363           | -              | -                        | QMEANBrane          | 0.85                             |
| <i>S. flexneri</i> | IpaD                      | PG3               | 5A              | 1            | 332           | 3R9V           | 100%                     | QMEANBrane          | 0.80                             |

- 1 **Table S7.**
- 2 Details of amino acid variants identified for the six antigen candidates among *S. flexneri* isolates from
- 3 GEMS. Table includes variant type, variant location, reference and alternative variant, and energy score of
- 4 the variant as predicted by premPS.
- 5
- 6 See separate Excel file

## 7 Reference

8

- 9 1. Khalil IA, Troeger C, Blacker BF, Rao PC, Brown A, Atherly DE, et al. Morbidity and mortality  
10 due to shigella and enterotoxigenic *Escherichia coli* diarrhoea: the Global Burden of Disease Study 1990-  
11 2016. *The Lancet infectious diseases*. 2018;18(11):1229-40.
- 12 2. Kotloff KL, Nataro JP, Blackwelder WC, Nasrin D, Farag TH, Panchalingam S, et al. Burden and  
13 aetiology of diarrhoeal disease in infants and young children in developing countries (the Global Enteric  
14 Multicenter Study, GEMS): a prospective, case-control study. *Lancet*. 2013;382(9888):209-22.
- 15 3. Liu J, Platts-Mills JA, Juma J, Kabir F, Nkeze J, Okoi C, et al. Use of quantitative molecular  
16 diagnostic methods to identify causes of diarrhoea in children: a reanalysis of the GEMS case-control  
17 study. *Lancet*. 2016;388(10051):1291-301.
- 18 4. Kotloff KL, Riddle MS, Platts-Mills JA, Pavlinac P, Zaidi AKM. Shigellosis. *Lancet*.  
19 2018;391(10122):801-12.
- 20 5. Shrivastava SR, Shrivastava PS, Ramasamy J. World health organization releases global priority  
21 list of antibiotic-resistant bacteria to guide research, discovery, and development of new antibiotics.  
22 *Journal of Medical Society*. 2018;32(1):76.
- 23 6. Barry EM, Pasetti MF, Sztein MB, Fasano A, Kotloff KL, Levine MM. Progress and pitfalls in  
24 *Shigella* vaccine research. *Nat Rev Gastroenterol Hepatol*. 2013;10(4):245-55.
- 25 7. Cohen D, Green MS, Block C, Slepov R, Ofek I. Prospective study of the association between  
26 serum antibodies to lipopolysaccharide O antigen and the attack rate of shigellosis. *Journal of clinical*  
27 *microbiology*. 1991;29(2):386-9.
- 28 8. Ferreccio C, Prado V, Ojeda A, Cayazo M, Abrego P, Guers L, et al. Epidemiologic patterns of  
29 acute diarrhea and endemic *Shigella* infections in children in a poor periurban setting in Santiago, Chile.  
30 *Am J Epidemiol*. 1991;134(6):614-27.
- 31 9. Formal SB, Oaks EV, Olsen RE, Wingfield-Eggleston M, Snoy PJ, Cogan JP. Effect of prior  
32 infection with virulent *Shigella flexneri* 2a on the resistance of monkeys to subsequent infection with  
33 *Shigella sonnei*. *J Infect Dis*. 1991;164(3):533-7.
- 34 10. Kotloff KL, Nataro JP, Losonsky GA, Wasserman SS, Hale TL, Taylor DN, et al. A modified  
35 *Shigella* volunteer challenge model in which the inoculum is administered with bicarbonate buffer:  
36 clinical experience and implications for *Shigella* infectivity. *Vaccine*. 1995;13(16):1488-94.
- 37 11. Levine MM, Kotloff KL, Barry EM, Pasetti MF, Sztein MB. Clinical trials of *Shigella* vaccines:  
38 two steps forward and one step back on a long, hard road. *Nat Rev Microbiol*. 2007;5(7):540-53.
- 39 12. Ashkenazi S, Cohen D. An update on vaccines against *Shigella*. *Ther Adv Vaccines*.  
40 2013;1(3):113-23.
- 41 13. Talaat KR, Alaimo C, Martin P, Bourgeois AL, Dreyer AM, Kaminski RW, et al. Human  
42 challenge study with a *Shigella* bioconjugate vaccine: Analyses of clinical efficacy and correlate of  
43 protection. *EBioMedicine*. 2021;66:103310.
- 44 14. Passwell JH, Ashkenazi S, Banet-Levi Y, Ramon-Saraf R, Farzam N, Lerner-Geva L, et al. Age-  
45 related efficacy of *Shigella* O-specific polysaccharide conjugates in 1-4-year-old Israeli children.  
46 *Vaccine*. 2010;28(10):2231-5.
- 47 15. Turbyfill KR, Kaminski RW, Oaks EV. Immunogenicity and efficacy of highly purified invasin  
48 complex vaccine from *Shigella flexneri* 2a. *Vaccine*. 2008;26(10):1353-64.



- 49 16. Martinez-Becerra FJ, Kissmann JM, Diaz-McNair J, Choudhari SP, Quick AM, Mellado-Sanchez  
50 G, et al. Broadly protective Shigella vaccine based on type III secretion apparatus proteins. *Infect Immun*.  
51 2012;80(3):1222-31.
- 52 17. Davies MR, McIntyre L, Mutreja A, Lacey JA, Lees JA, Towers RJ, et al. Atlas of group A  
53 streptococcal vaccine candidates compiled using large-scale comparative genomics. *Nat Genet*.  
54 2019;51(6):1035-43.
- 55 18. Telford JL. Bacterial genome variability and its impact on vaccine design. *Cell Host Microbe*.  
56 2008;3(6):408-16.
- 57 19. Livio S, Strockbine NA, Panchalingam S, Tennant SM, Barry EM, Marohn ME, et al. Shigella  
58 isolates from the global enteric multicenter study inform vaccine development. *Clin Infect Dis*.  
59 2014;59(7):933-41.
- 60 20. Connor TR, Barker CR, Baker KS, Weill FX, Talukder KA, Smith AM, et al. Species-wide whole  
61 genome sequencing reveals historical global spread and recent local persistence in *Shigella flexneri*. *Elife*.  
62 2015;4:e07335.
- 63 21. Holt KE, Baker S, Weill FX, Holmes EC, Kitchen A, Yu J, et al. *Shigella sonnei* genome  
64 sequencing and phylogenetic analysis indicate recent global dissemination from Europe. *Nat Genet*.  
65 2012;44(9):1056-9.
- 66 22. Njamkepo E, Fawal N, Tran-Dien A, Hawkey J, Strockbine N, Jenkins C, et al. Global  
67 phylogeography and evolutionary history of *Shigella dysenteriae* type 1. *Nat Microbiol*. 2016;1:16027.
- 68 23. Kania DA, Hazen TH, Hossain A, Nataro JP, Rasko DA. Genome diversity of *Shigella boydii*.  
69 *Pathog Dis*. 2016;74(4):ftw027.
- 70 24. Hawkey J, Paranagama K, Baker KS, Bengtsson RJ, Weill F-X, Thomson NR, et al. Global  
71 population structure and genotyping framework for genomic surveillance of the major dysentery  
72 pathogen, *Shigella sonnei*. *Nature Communications*. 2021;12(1):2684.
- 73 25. Sahl JW, Morris CR, Emberger J, Fraser CM, Ochieng JB, Juma J, et al. Defining the  
74 phylogenomics of *Shigella* species: a pathway to diagnostics. *J Clin Microbiol*. 2015;53(3):951-60.
- 75 26. von Seidlein L, Kim DR, Ali M, Lee H, Wang X, Thiem VD, et al. A multicentre study of  
76 *Shigella* diarrhoea in six Asian countries: disease burden, clinical manifestations, and microbiology. *PLoS*  
77 *Med*. 2006;3(9):e353.
- 78 27. Ye C, Lan R, Xia S, Zhang J, Sun Q, Zhang S, et al. Emergence of a new multidrug-resistant  
79 serotype X variant in an epidemic clone of *Shigella flexneri*. *J Clin Microbiol*. 2010;48(2):419-26.
- 80 28. Allison GE, Verma NK. Serotype-converting bacteriophages and O-antigen modification in  
81 *Shigella flexneri*. *Trends Microbiol*. 2000;8(1):17-23.
- 82 29. Sun Q, Knirel YA, Lan R, Wang J, Senchenkova SN, Jin D, et al. A novel plasmid-encoded  
83 serotype conversion mechanism through addition of phosphoethanolamine to the O-antigen of *Shigella*  
84 *flexneri*. *PLoS One*. 2012;7(9):e46095.
- 85 30. Weinberger DM, Malley R, Lipsitch M. Serotype replacement in disease after pneumococcal  
86 vaccination. *Lancet*. 2011;378(9807):1962-73.
- 87 31. Brueggemann AB, Pai R, Crook DW, Beall B. Vaccine escape recombinants emerge after  
88 pneumococcal vaccination in the United States. *PLoS Pathog*. 2007;3(11):e168.
- 89 32. McVicker G, Tang CM. Deletion of toxin-antitoxin systems in the evolution of *Shigella sonnei* as  
90 a host-adapted pathogen. *Nat Microbiol*. 2016;2:16204.
- 91 33. Garcia-Beltran WF, Lam EC, St Denis K, Nitido AD, Garcia ZH, Hauser BM, et al. Multiple  
92 SARS-CoV-2 variants escape neutralization by vaccine-induced humoral immunity. *Cell*. 2021.
- 93 34. Zhou D, Dejnirattisai W, Supasa P, Liu C, Mentzer AJ, Ginn HM, et al. Evidence of escape of  
94 SARS-CoV-2 variant B.1.351 from natural and vaccine-induced sera. *Cell*. 2021.

- 95 35. Mills JA, Buysse JM, Oaks EV. *Shigella flexneri* invasion plasmid antigens B and C: epitope  
96 location and characterization with monoclonal antibodies. *Infect Immun*. 1988;56(11):2933-41.
- 97 36. Turbyfill KR, Mertz JA, Mallett CP, Oaks EV. Identification of epitope and surface-exposed  
98 domains of *Shigella flexneri* invasion plasmid antigen D (IpaD). *Infect Immun*. 1998;66(5):1999-2006.
- 99 37. Czerkinsky C, Kim DW. *Shigella* protein antigens and methods. US Patent 8168203; 2012.
- 100 38. Pore D, Mahata N, Pal A, Chakrabarti MK. Outer membrane protein A (OmpA) of *Shigella*  
101 *flexneri* 2a, induces protective immune response in a mouse model. *PLoS One*. 2011;6(7):e22663.
- 102 39. Organization WH. Guidelines for the control of shigellosis, including epidemics due to *Shigella*  
103 *dysenteriae* type 1. 2005.
- 104 40. Chung The H, Baker S. Out of Asia: the independent rise and global spread of fluoroquinolone-  
105 resistant *Shigella*. *Microb Genom*. 2018;4(4).
- 106 41. Sadouki Z, Day MR, Doumith M, Chattaway MA, Dallman TJ, Hopkins KL, et al. Comparison  
107 of phenotypic and WGS-derived antimicrobial resistance profiles of *Shigella sonnei* isolated from cases  
108 of diarrhoeal disease in England and Wales, 2015. *J Antimicrob Chemother*. 2017;72(9):2496-502.
- 109 42. Baker KS, Dallman TJ, Ashton PM, Day M, Hughes G, Crook PD, et al. Intercontinental  
110 dissemination of azithromycin-resistant shigellosis through sexual transmission: a cross-sectional study.  
111 *Lancet Infect Dis*. 2015;15(8):913-21.
- 112 43. Williams PCM, Berkley JA. Guidelines for the treatment of dysentery (shigellosis): a systematic  
113 review of the evidence. *Paediatr Int Child Health*. 2018;38(sup1):S50-S65.
- 114 44. Chung The H, Rabaa MA, Pham Thanh D, De Lappe N, Cormican M, Valcanis M, et al. South  
115 Asia as a Reservoir for the Global Spread of Ciprofloxacin-Resistant *Shigella sonnei*: A Cross-Sectional  
116 Study. *PLoS Med*. 2016;13(8):e1002055.
- 117 45. Chung The H, Boinett C, Pham Thanh D, Jenkins C, Weill FX, Howden BP, et al. Dissecting the  
118 molecular evolution of fluoroquinolone-resistant *Shigella sonnei*. *Nat Commun*. 2019;10(1):4828.
- 119 46. Ingle DJ, Levine MM, Kotloff KL, Holt KE, Robins-Browne RM. Dynamics of antimicrobial  
120 resistance in intestinal *Escherichia coli* from children in community settings in South Asia and sub-  
121 Saharan Africa. *Nat Microbiol*. 2018;3(9):1063-73.
- 122 47. Makoni M. Africa's \$100-million Pathogen Genomics Initiative. *The Lancet Microbe*.  
123 2020;1(8):e318.
- 124 48. AMR NGHRUoGSo. Whole-genome sequencing as part of national and international  
125 surveillance programmes for antimicrobial resistance: a roadmap. *BMJ Global Health*.  
126 2020;5(11):e002244.
- 127 49. Perez-Sepulveda BM, Heavens D, Pulford CV, Predeus AV, Low R, Webster H, et al. An  
128 accessible, efficient and global approach for the large-scale sequencing of bacterial genomes. *BioRxiv*.  
129 2020.
- 130 50. Bolger AM, Lohse M, Usadel B. Trimmomatic: a flexible trimmer for Illumina sequence data.  
131 *Bioinformatics*. 2014;30(15):2114-20.
- 132 51. Ewels P, Magnusson M, Lundin S, Kaller M. MultiQC: summarize analysis results for multiple  
133 tools and samples in a single report. *Bioinformatics*. 2016;32(19):3047-8.
- 134 52. Li H. Aligning sequence reads, clone sequences and assembly contigs with BWA-MEM. *arXiv*  
135 preprint *arXiv:13033997*. 2013.
- 136 53. Li H, Handsaker B, Wysoker A, Fennell T, Ruan J, Homer N, et al. The Sequence  
137 Alignment/Map format and SAMtools. *Bioinformatics*. 2009;25(16):2078-9.
- 138 54. Garcia-Alcalde F, Okonechnikov K, Carbonell J, Cruz LM, Gotz S, Tarazona S, et al. Qualimap:  
139 evaluating next-generation sequencing alignment data. *Bioinformatics*. 2012;28(20):2678-9.

- 140 55. Arndt D, Grant JR, Marcu A, Sajed T, Pon A, Liang Y, et al. PHASTER: a better, faster version  
141 of the PHAST phage search tool. *Nucleic Acids Res.* 2016;44(W1):W16-21.
- 142 56. Quinlan AR. BEDTools: The Swiss-Army Tool for Genome Feature Analysis. *Curr Protoc*  
143 *Bioinformatics.* 2014;47:11 2 1-34.
- 144 57. Croucher NJ, Page AJ, Connor TR, Delaney AJ, Keane JA, Bentley SD, et al. Rapid phylogenetic  
145 analysis of large samples of recombinant bacterial whole genome sequences using Gubbins. *Nucleic*  
146 *Acids Res.* 2015;43(3):e15.
- 147 58. Nguyen LT, Schmidt HA, von Haeseler A, Minh BQ. IQ-TREE: a fast and effective stochastic  
148 algorithm for estimating maximum-likelihood phylogenies. *Mol Biol Evol.* 2015;32(1):268-74.
- 149 59. Letunic I, Bork P. Interactive Tree Of Life (iTOL) v4: recent updates and new developments.  
150 *Nucleic Acids Res.* 2019;47(W1):W256-W9.
- 151 60. Rambaut A, Lam TT, Max Carvalho L, Pybus OG. Exploring the temporal structure of  
152 heterochronous sequences using TempEst (formerly Path-O-Gen). *Virus Evol.* 2016;2(1):vew007.
- 153 61. Bouckaert R, Heled J, Kuhnert D, Vaughan T, Wu CH, Xie D, et al. BEAST 2: a software  
154 platform for Bayesian evolutionary analysis. *PLoS Comput Biol.* 2014;10(4):e1003537.
- 155 62. Bouckaert RR, Drummond AJ. bModelTest: Bayesian phylogenetic site model averaging and  
156 model comparison. *BMC Evol Biol.* 2017;17(1):42.
- 157 63. Rambaut A, Drummond AJ, Xie D, Baele G, Suchard MA. Posterior Summarization in Bayesian  
158 Phylogenetics Using Tracer 1.7. *Syst Biol.* 2018;67(5):901-4.
- 159 64. Bouckaert R, Vaughan TG, Barido-Sottani J, Duchene S, Fourment M, Gavryushkina A, et al.  
160 BEAST 2.5: An advanced software platform for Bayesian evolutionary analysis. *PLoS Comput Biol.*  
161 2019;15(4):e1006650.
- 162 65. Wick RR, Judd LM, Gorrie CL, Holt KE. Unicycler: resolving bacterial genome assemblies from  
163 short and long sequencing reads. *PLoS computational biology.* 2017;13(6):e1005595.
- 164 66. Gurevich A, Saveliev V, Vyahhi N, Tesler G. QUAST: quality assessment tool for genome  
165 assemblies. *Bioinformatics.* 2013;29(8):1072-5.
- 166 67. Seemann T. Prokka: rapid prokaryotic genome annotation. *Bioinformatics.* 2014;30(14):2068-9.
- 167 68. Page AJ, Cummins CA, Hunt M, Wong VK, Reuter S, Holden MT, et al. Roary: rapid large-scale  
168 prokaryote pan genome analysis. *Bioinformatics.* 2015;31(22):3691-3.
- 169 69. Wu Y, Lau HK, Lee T, Lau DK, Payne J. In Silico Serotyping Based on Whole-Genome  
170 Sequencing Improves the Accuracy of Shigella Identification. *Appl Environ Microbiol.* 2019;85(7).
- 171 70. Inouye M, Dashnow H, Raven LA, Schultz MB, Pope BJ, Tomita T, et al. SRST2: Rapid  
172 genomic surveillance for public health and hospital microbiology labs. *Genome Med.* 2014;6(11):90.
- 173 71. Altschul SF, Madden TL, Schaffer AA, Zhang J, Zhang Z, Miller W, et al. Gapped BLAST and  
174 PSI-BLAST: a new generation of protein database search programs. *Nucleic Acids Res.*  
175 1997;25(17):3389-402.
- 176 72. Larsson A. AliView: a fast and lightweight alignment viewer and editor for large datasets.  
177 *Bioinformatics.* 2014;30(22):3276-8.
- 178 73. Hildebrand A, Remmert M, Biegert A, Soding J. Fast and accurate automatic structure prediction  
179 with HHpred. *Proteins.* 2009;77 Suppl 9:128-32.
- 180 74. Zimmermann L, Stephens A, Nam SZ, Rau D, Kubler J, Lozajic M, et al. A Completely  
181 Reimplemented MPI Bioinformatics Toolkit with a New HHpred Server at its Core. *J Mol Biol.*  
182 2018;430(15):2237-43.
- 183 75. Song Y, DiMaio F, Wang RY, Kim D, Miles C, Brunette T, et al. High-resolution comparative  
184 modeling with RosettaCM. *Structure.* 2013;21(10):1735-42.

- 185 76. Yang J, Anishchenko I, Park H, Peng Z, Ovchinnikov S, Baker D. Improved protein structure  
186 prediction using predicted interresidue orientations. *Proceedings of the National Academy of Sciences*.  
187 2020;117(3):1496-503.
- 188 77. Studer G, Rempfer C, Waterhouse AM, Gumienny R, Haas J, Schwede T. QMEANDisCo-  
189 distance constraints applied on model quality estimation. *Bioinformatics*. 2020;36(8):2647.
- 190 78. Studer G, Biasini M, Schwede T. Assessing the local structural quality of transmembrane protein  
191 models using statistical potentials (QMEANBrane). *Bioinformatics*. 2014;30(17):i505-11.
- 192 79. Chen Y, Lu H, Zhang N, Zhu Z, Wang S, Li M. PremPS: Predicting the impact of missense  
193 mutations on protein stability. *PLoS Comput Biol*. 2020;16(12):e1008543.
- 194 80. Feldgarden M, Brover V, Haft DH, Prasad AB, Slotta DJ, Tolstoy I, et al. Validating the  
195 AMRFinder Tool and Resistance Gene Database by Using Antimicrobial Resistance Genotype-Phenotype  
196 Correlations in a Collection of Isolates. *Antimicrob Agents Chemother*. 2019;63(11).
- 197 81. Conway JR, Lex A, Gehlenborg N. UpSetR: an R package for the visualization of intersecting  
198 sets and their properties. *Bioinformatics*. 2017;33(18):2938-40.
- 199 82. Hudzicki J. Kirby-Bauer disk diffusion susceptibility test protocol. 2009.

200
